1 [The organization of intracortical connections by layer and cell class in the mouse brain](#)

2 Julie A. Harris\*<sup>1</sup>, Stefan Mihalas<sup>1</sup>, Karla E. Hirokawa<sup>1</sup>, Jennifer D. Whitesell<sup>1</sup>, Joseph E. Knox<sup>1</sup>, Amy  
3 Bernard<sup>1</sup>, Phillip Bohn<sup>1</sup>, Shiella Caldejon<sup>1</sup>, Linzy Casal<sup>1</sup>, Andrew Cho<sup>1</sup>, David Feng<sup>1</sup>, Nathalie  
4 Gaudreault<sup>1</sup>, Charles R. Gerfen<sup>2</sup>, Nile Graddis<sup>1</sup>, Peter A. Groblewski<sup>1</sup>, Alex Henry<sup>1</sup>, Anh Ho<sup>1</sup>, Robert  
5 Howard<sup>1</sup>, Leonard Kuan<sup>1</sup>, Jerome Lecoq<sup>1</sup>, Jennifer Luviano<sup>1</sup>, Stephen McConoghy<sup>1</sup>, Marty T. Mortrud<sup>1</sup>,  
6 Maitham Naeemi<sup>1</sup>, Lydia Ng<sup>1</sup>, Seung W. Oh<sup>1</sup>, Benjamin Ouellette<sup>1</sup>, Staci A. Sorensen<sup>1</sup>, Wayne  
7 Wakeman<sup>1</sup>, Quanxin Wang<sup>1</sup>, Ali Williford<sup>1</sup>, John W. Phillips<sup>1</sup>, Allan Jones<sup>1</sup>, Christof Koch<sup>1</sup>, and Hongkui  
8 Zeng<sup>1</sup>

9 <sup>1</sup>Allen Institute for Brain Science

10 <sup>2</sup>Laboratory of Systems Neuroscience, National Institute of Mental Health

11 \*Correspondence should be addressed to J.A.H. ([julieha@alleninstitute.org](mailto:julieha@alleninstitute.org))

12 [Abstract](#)

13 The mammalian cortex is a laminar structure composed of many cell types densely interconnected in  
14 complex ways. Recent systematic efforts to map the mouse mesoscale connectome provide  
15 comprehensive projection data on interareal connections, but not at the level of specific cell classes or  
16 layers within cortical areas. We present here a significant expansion of the Allen Mouse Brain  
17 Connectivity Atlas, with ~1,000 new axonal projection mapping experiments across nearly all isocortical  
18 areas in 49 Cre driver lines. Using 13 lines selective for cortical layer-specific projection neuron  
19 classes, we identify the differential contribution of each layer/class to the overall intracortical  
20 connectivity patterns. We find layer 5 (L5) projection neurons account for essentially all intracortical  
21 outputs. L2/3, L4, and L6 neurons contact a subset of the L5 cortical targets. We also describe the  
22 most common axon lamination patterns in cortical targets. Most patterns are consistent with previous  
23 anatomical rules used to determine hierarchical position between cortical areas (feedforward,  
24 feedback), with notable exceptions. While diverse target lamination patterns arise from every source  
25 layer/class, L2/3 and L4 neurons are primarily associated with feedforward type projection patterns  
26 and L6 with feedback. L5 has both feedforward and feedback projection patterns. Finally, network  
27 analyses revealed a modular organization of the intracortical connectome. By labeling interareal and  
28 intermodule connections as feedforward or feedback, we present an integrated view of the intracortical  
29 connectome as a hierarchical network.

30

31 Cognitive processes and voluntary control of behavior originates in the isocortex. Understanding how  
32 incoming sensory information is processed, integrated with past experiences and current states to  
33 generate memories, percepts, and motor outputs requires knowledge of the anatomical patterns and rules  
34 of connectivity between cortical areas. Connectomes, complete descriptions of the wiring in a brain<sup>1</sup>, exist  
35 at different levels of spatial granularity (micro-, meso-, and macro-scale), each revealing different  
36 principles of brain organization. At the mesoscale<sup>2</sup>, connectivity is described at the level of cell  
37 populations, classes, or types. Recently, several mesoscale cortical connectomes have been produced,  
38 either through new systematic data generation<sup>3-5</sup>, or via expert collation of historical tract tracing  
39 literature<sup>6-8</sup>. Common organizational features of cortical connectivity in both rodent and macaque have  
40 been distilled from these datasets, often using graph theoretical approaches to describe network  
41 architecture<sup>9,10</sup>. For example, areas have unique patterns of connections (*i.e.*, a “fingerprint”), connection  
42 strengths follow a log-normal distribution spanning > 4 orders of magnitude<sup>4,5</sup>, and networks display high  
43 clustering coefficients, with some highly connected nodes (“hubs”)<sup>4</sup>. Finally, the organization of cortical  
44 areas is modular, with distinct modules corresponding to specific functions<sup>3,11</sup>.

45 Organizational schemes other than modular networks have previously been applied to cortical  
46 connections to explain information flow and processing. Specifically, the concept of a cortical  
47 hierarchy<sup>12,13</sup> has been useful for understanding computational and architectural properties of the cortex  
48 and has inspired the development of neuronal network methods in machine vision<sup>14</sup>. These schemes  
49 (modular and hierarchical) are not mutually exclusive, and the actual organization of the cortex involves  
50 both types.

51 So far, the available mesoscale datasets are not clearly differentiated from macroscale connectivity in that  
52 the experiments and analyses focus on connections between areas, treating them as more or less  
53 homogenous regions. Data are often generated using tracers that cover entire cortical columns. In the  
54 first phase of the Allen Mouse Brain Connectivity Atlas, injections were intentionally placed at multiple  
55 depths within a cortical area in one experiment to infect all neurons across the cortical layers<sup>4</sup>. However,  
56 each cortical region is composed of a heterogeneous mix of distinct cell types. Perhaps the most  
57 characteristic feature of the isocortex is its organization into six layers. Within these layers, distinct cell  
58 types exist that can be further differentiated based on morphological, electrophysiological, and  
59 transcriptional properties<sup>15-17</sup>. Specific long-distance connectivity patterns are associated with excitatory  
60 cell populations or genetically-identified types in each layer<sup>16,18</sup>. Long-distance axon projections are  
61 commonly used to classify excitatory neurons into three main classes; intratelencephalic (IT), pyramidal  
62 tract (PT), and corticothalamic (CT). Axons from IT neurons project to both ipsilateral and contralateral  
63 cortex and striatum. PT neurons target subcortical structures, including those in the spinal cord, medulla,  
64 pons, and midbrain, and can send branches to ipsilateral cortex, striatum, and thalamus. CT neurons  
65 project to ipsilateral thalamus. IT neurons are found across all layers containing excitatory cells (L2/3, L4,  
66 L5, L6), while PT neurons locate to L5 and CT neurons to L6<sup>19,20</sup>. Projections from these major classes to  
67 different target regions suggests that they play distinct roles in information processing.

68 Experimental access to cortical cells in different layers and classes is feasible due to the generation of  
69 diverse Cre driver transgenic mouse lines<sup>21-24</sup>. By taking advantage of them, we significantly expanded  
70 upon our previously published Allen Mouse Brain Connectivity Atlas (<http://connectivity.brain-map.org><sup>4,25</sup>)  
71 adding ~ 1,000 new experiments in the cortex. Here we present this enhanced online resource of  
72 projection data from cortical cell classes defined by laminar position and brain-wide projection patterns.  
73 We first describe the macroscale organization of cortical connectivity into six network modules and the  
74 unique patterns of intracortical connectivity from each source. Then, we show the contribution of each  
75 layer-specific projection neuron class to the complete intracortical projection pattern for a given region.  
76 We observe diverse axon lamination patterns in cortical targets related to the layer of origin and  
77 projection neuron class labeled by each Cre line. These patterns are both similar to and different from  
78 previous anatomical patterns derived from anterograde tracing to define hierarchical position (feedforward  
79 and feedback) in the visual cortex of primates<sup>12</sup> and rodents<sup>26</sup>. Using the cell layer/class-based projection  
80 patterns, we ordered 37 of 43 isocortical areas into hierarchical positions. We also ordered the network

81 modules identified here; from bottom to top: somatomotor, temporal, visual, medial, anterolateral, and  
82 prefrontal cortex.

## 83 Results

### 84 *Data generation and characterization of Cre driver lines for layer- and cell class-selective mapping*

85 Our pre-existing pipeline for generation and quantification of projection mapping data across the entire  
86 brain<sup>4</sup> was used in this study, with some modifications. In brief, in Oh et al., 2014 we used only wild-type  
87 C57BL/6J mice injected with a Cre-independent tracer, rAAV2/1.hSyn.EGFP.WPRE. Here, we used  
88 transgenic Cre driver mice. Most Cre mice were injected with a Cre-dependent rAAV tracer,  
89 rAAV2/1.pCAG.FLEX.EGFP.WPRE. A subset had a duplicate injection of an rAAV with a synaptophysin-  
90 EGFP fusion transgene in place of the cytoplasmic EGFP, rAAV2/1.pCAG.FLEX.SypEGFP.WPRE.  
91 Results from these two tracers were highly and significantly correlated for injections in close spatial  
92 proximity (**Supplemental Figure 1**). Thus, we included the SypEGFP datasets when indicated for  
93 analyses of connectivity patterns from given source areas. Following tracer injections, brains were imaged  
94 using serial 2-photon tomography<sup>27</sup> (STP) at high x-y resolution (0.35  $\mu\text{m}$  x 0.35  $\mu\text{m}$ ) every 100  $\mu\text{m}$ , after  
95 which the images underwent QC and manual annotation of injection sites, followed by signal detection  
96 and registration to the Allen Mouse Brain Common Coordinate Framework (CCF), our fully annotated 3D  
97 volumetric reference atlas, for subsequent data analyses, data visualization, and public release to our  
98 web portal<sup>28</sup>.

99 Our goal for expanding on the Allen Mouse Brain Connectivity Atlas (<http://connectivity.brain-map.org>)  
100 was to create a comprehensive map of all inter-areal projections originating from neurons of different cell  
101 classes within a given source. Forty-nine Cre driver lines (**Supplemental Table 1**) entered the pipeline for  
102 cortical projection mapping after initial anatomical characterization of transgene expression across the  
103 brain using *in situ* hybridization<sup>23</sup> (<http://connectivity.brain-map.org/transgenic>). These driver lines have  
104 either pan-layer Cre expression (e.g. Emx1-IRES-Cre), layer-selective Cre expression, or Cre expression  
105 driven by inhibitory neuron-specific promoters. Layer-selectivity data for 15 lines are summarized in the  
106 second row (“Layer”) of **Figure 1a**. Data used to determine layer-selectivity can be found in  
107 **Supplemental Figure 2**. Many Cre lines showed relatively even distribution of expression across the  
108 entire isocortex, but we also saw gradients and area-restricted expression patterns which were used to  
109 choose appropriate locations for tracer injections.

110 Across the 50 mouse lines (49 Cre and wild type), we generated a total of 1,082 experiments  
111 (**Supplemental Tables 1 and 2**). Most of these experiments (n=850) used 15 out of 50 lines (14 Cre and  
112 wild type). **Figure 1a** shows the 850 tracer experiments by line and cortical area. Mouse isocortex is  
113 parcellated into 43 areas in the Allen CCF, visualized here in two ways. A top-down view (**Figure 1b**), and  
114 a flattened view of the entire right hemisphere of cortex, to show all cortical areas in one 2D image  
115 (**Figure 1c**). Locations of the injections’ centroids (x,y,z voxel coordinate after registration to the Allen  
116 CCF) for all 1,082 experiments are plotted onto the cortical surface flat map in **Figure 1d**. Left side  
117 injections were plotted here on the right hemisphere to visualize completeness of areal coverage. All  
118 subsequent analyses refer to “ipsilateral” and “contralateral” relative to the side of injection. Of the 43  
119 cortical areas, only 10 had 5 or fewer experiments. These areas (FRP, Alv, SSp-un, Alp, GU, VISC,  
120 AUDv, TEa, PERI, and ECT) were generally harder to target due to their size (SSp-un) or their location in  
121 very ventral or lateral regions (see **Figure 1c**). Abbreviations for isocortex regions are included in  
122 **Supplemental information**.

123 Data from all 1,000+ experiments in the isocortex are publicly available at the Allen Mouse Brain  
124 Connectivity Atlas data portal (<http://connectivity.brain-map.org/>). Individual experimental IDs and  
125 associated metadata are listed in **Supplemental Table 2**.

126 We visually inspected the brain-wide axonal projection patterns and classified all 1000+ experiments  
127 based on the principles described above for defining IT, PT, and CT neuron classes. Each experiment  
128 was manually assigned to one of five groups (**Supplemental Figure 3a-e**); (a) IT PT CT, when labeled

129 axons were observed in all regions of interest (ipsilateral and contralateral cortex and striatum, and  
130 subcortical and thalamic projections), (b) IT, when labeled axons were restricted to ipsilateral and  
131 contralateral cortex and striatum, (c) PT, when labeled axons were ipsilateral and subcortically-projecting,  
132 (d) CT, when labeled axons projected almost exclusively to thalamus, and (e) local, when no (or few)  
133 long-distance (*i.e.*, outside of the source area) axons were seen. The consensus of results across all  
134 sources for each mouse line is shown in the “projection class row” of **Figure 1a**. More details can be  
135 found in **Supplemental Figure 3f**, which shows both the consensus projection neuron class for each Cre  
136 line and the class per source mapped within a Cre line. A subset of Cre lines are highly selective for IT,  
137 PT, or CT neurons, consistent with previous characterizations<sup>22,29,30</sup>. Most lines label neurons of the same  
138 projection class independent of the source area, but there are interesting exceptions. For example, L5  
139 cells expressing Cre in the *Chrna2-Cre\_OE25* line are of the PT class in 14 of the 19 sources tested, but  
140 only locally projecting neurons are labeled in other sources (e.g. *VISp*) in this line. The manual  
141 assignment of experiments and Cre lines to projection neuron classes was also validated through  
142 unsupervised hierarchical clustering analysis of informatically-derived whole brain projection volumes in  
143 relevant major brain divisions (**Supplemental Figure 4**).

144 Together, the characterization of layer- and projection neuron class-selectivity for each Cre line enabled  
145 us to choose a core set of the best lines for comprehensively mapping connectivity from known classes of  
146 projection neurons in each cortical layer. These 13 lines, together with experiments in wild type mice  
147 (*C57BL/6J*) and the pan-layer *Emx1-IRES-Cre* line were used to identify all intracortical projections.  
148 These lines include L2/3 IT (*Cux2-IRES-Cre* and *Sepw1-Cre\_NP39*), L4 IT (*Nr5a1-Cre*, *Scnn1a-Tg3-Cre*,  
149 and *Rorb-IRES-Cre*), L5 IT (*Tlx3-Cre\_PL56*), L5 PT (*A93-Tg1-Cre*, *Chrna2-Cre\_OE25*, *Efr3a-*  
150 *Cre\_NO108*, *Sim1-Cre\_KJ18*), L5-all classes (*Rbp4-Cre\_KL100*), and L6 CT (*Ntsr1-Cre\_GN220*, *Syt6-*  
151 *Cre\_KI148*). One class for which we did not identify a suitable Cre line is L6 IT<sup>16</sup>.

#### 152 *Intracortical connections are organized into modules*

153 Cortical areas have distinct patterns (targets and weights) of corticocortical projections revealed through  
154 anterograde tracing in wild type mice<sup>3,4</sup> (**Figure 2**). However, similarities between output patterns of some  
155 areas are also obvious when viewing the anatomical data spatially (**Figure 2a**) or the connection  
156 strengths in matrix form (**Figure 2b**). The matrix shows the output of a new data-driven model, which, for  
157 the isocortex, was based on 122 injections in wild type mice<sup>31</sup>. This model differs from our previously  
158 published model<sup>4</sup> in that it is built through spatial interpolation at the voxel level (100  $\mu\text{m}$ ), rather than for  
159 each brain region, enabling the recovery of high spatial resolution for connectivity strengths between  
160 voxels. The voxel-based connection strengths were then unionized for every isocortical region annotated  
161 in the Allen CCF ( $n=43$ , **Figure 1**). **Figure 2b** shows the ipsilateral intracortical connectivity matrix.

162 We analyzed the network structure of this ipsilateral matrix using the Louvain algorithm from the Brain  
163 Connectivity Toolbox<sup>32</sup>. This algorithm maximizes a modularity metric ( $Q$ ) to identify groups of nodes  
164 (cortical areas) most densely connected to each other compared to a randomized network.  $Q$  quantifies  
165 the fraction of connections inside modules minus the fraction of connections expected inside the same  
166 modules if the network were connected randomly, *i.e.*,  $Q=0$  has no more intramodule connections than  
167 expected by chance, while  $Q>0$  indicates a network with some community structure.

168 To identify stable modules, we systematically varied the spatial resolution parameter,  $\gamma$ , from 0 to 2.5, and  
169 measured  $Q$  at each value of  $\gamma$ , compared to  $Q$  for a shuffled network. Increasing  $\gamma$  enables the detection  
170 of more modules, each containing fewer nodes<sup>8,33</sup>. The mouse cortex showed significant modularity ( $Q>Q$   
171 for the shuffled network) for every value of  $\gamma$  above 0.3. Between 1 and 14 modules were identified across  
172 this range (**Figure 2b**, colors on left axis). For subsequent analyses, we chose to focus on the modules  
173 identified at  $\gamma=1.3$  ( $Q=0.37$ ). This value of  $\gamma$  corresponds to the midpoint between no modules at all, and  
174 the  $\gamma$  value of 2.5 where modules contain single regions. It is also the  $\gamma$  level where the difference  
175 between  $Q$  and  $Q_{\text{shuffled}}$  was at its peak ( $0.2224\pm 0.0021$ ), although this difference was relatively stable



176 between  $\gamma=1$  and  $\gamma=1.8$  ( $0.2187\pm 0.0048$  at  $\gamma=1$ ,  $0.2020\pm 0.0009$  at  $\gamma=1.8$ ). The network is divided into six  
177 modules at this point, containing 5-8 regions each.

178 We named the six modules based on the cortical areas assigned to each; (1) **Prefrontal**: FRP, MOs,  
179 ACAd, ACAv, PL, ILA, ORBI, ORBm, ORBvl (2), **Anterolateral**: Aid, Alv, Alp, GU, VISC, (3)  
180 **Somatomotor**: SSS, SSp-bfd, SSp-tr, SSp-ll, SSp-ul, SSp-un, SSp-n, SSp-m, MOp, (4) **Visual**: VISal,  
181 VISrl, VISl, VISp, VISpl, VISli, VISpor, (5) **Medial**: RSPagl, RSPd, RSPv, VISa, VISam, VISpm, and (6)  
182 **Temporal**: AUDd, AUDp, AUDpo, AUDv, TEa, PERI, and ECT. Although we use these six modules for  
183 subsequent analyses, and to describe the organization of cortical areas based on connections, it should  
184 be emphasized that there are other, equally valid, levels of organization that could be chosen. For  
185 example, there is a four-module solution at  $\gamma=1.0$  that results in prefrontal, somatomotor, visual, and  
186 temporal modules, in which the anterolateral areas are not split from somatomotor areas, and medial  
187 regions are still grouped with the visual areas. The spatial relationships between areas in these six  
188 modules are shown in the 3D renderings of brain areas in the Allen CCF in **Figure 2c**. There is a clear  
189 spatial component to the module assignment, in that nearby areas often belong to the same module. This  
190 is perhaps not surprising given that connectivity strengths drop as a function of distance<sup>4,34</sup>, but does not  
191 negate the likely importance of long-distance intermodule connections for integration and information  
192 flow. The network of connections within and between all modules and nodes was also visualized using a  
193 force-directed layout algorithm<sup>35</sup> which highlights the overall high density, and variation in connection  
194 strengths across the cortex (**Figure 2d**).

#### 195 *Interareal patterns of connectivity by output layer and class*

196 Network analysis of the ipsilateral intracortical connectivity matrix revealed a modular organization based  
197 on the total output of a given cortical area. While this provides an important framework for understanding  
198 macroscale rules of cortical connectivity, the contributions of distinct cell classes within each area to the  
199 overall pattern are still unknown. To explore this, we first compiled groups of spatially-matched  
200 experiments. These experiments were pulled from the 850 listed in **Figure 1a**, using up to 15 mouse lines  
201 for coverage of layer/class within a given source. Each group was “anchored” by one of 90 Rbp4-  
202 Cre\_KL100 tracer experiments (green triangles, **Figure 1d**). Rbp4-Cre\_KL100 is a L5 selective line which  
203 labels all classes of projection neurons in L5. This line was chosen as the anchor because the largest  
204 number of sources were injected (33 of 43 cortical areas had at least 1 experiment) of all the Cre lines.  
205 Potential group members for each anchor were defined as experiments where the distance between the  
206 Rbp4 and other experiment injection centroids was  $<500\ \mu\text{m}$ . An experiment was only used once, even if  
207 it was within  $500\ \mu\text{m}$  of two Rbp4 anchors. To be considered a complete group, at least one experiment  
208 from a Cre line representing L2/3 IT, L4 IT, L5 IT, L5 PT, L6 CT, and a wild type or Emx1-IRES-Cre  
209 dataset had to be present. Within a group, the median distance from the Rbp4-Cre\_KL100 anchor was  
210  $296\ \mu\text{m}$ . For some anchors, when a specific Cre line was otherwise missing, the injection centroid  
211 distance exceeded  $500\ \mu\text{m}$  (range  $502\text{-}616\ \mu\text{m}$ ,  $24/332$  total experiments). All experiments within a group  
212 utilized the same tracer (*i.e.*, SypEGFP experiments were not grouped with EGFP experiments). In this  
213 way, we identified 43 anchor groups composed of unique sets of experiments ( $n=364$  total), representing  
214 25 of 43 potential source areas (**Supplemental Table 3**).

215 The locations of all anchor groups and individual experiments are shown mapped onto the flat cortical  
216 surface view in **Figure 3a**. Five examples are shown to illustrate layer selectivity, spatial matching of  
217 injections into different lines, and cortical projection patterns by line, including sources from the prefrontal  
218 cortex module (ACAd and MOs, **Figure 3b,c**), somatomotor module (SSp-m, **Figure 3d**), visual module  
219 (VISp, **Figure 3e**), and medial module (VISam, **Figure 3f**). 2D overlays of the injection sites confirmed the  
220 expected layer selectivity and relative size or proportion of cells labeled in these different experiments  
221 (**Figure 3b'-f'**, and see **Supplemental Figure 5** for individual panels). For example, prefrontal areas  
222 ACAd and MOs are both agranular structures (lacking L4), and the corresponding injections into the  
223 predominantly L4 IT Cre lines Scnn1a-Tg-3 or Nr5a1-Cre (colored in magenta) result in much sparser  
224 labeling than for areas with a large L4, such as primary somatosensory and visual areas (compare **Figure**

225 **3b'-c'** with **d'-e'**). The distribution and density of cells labeled after viral infection of Cre-dependent  
226 reporter in each injection also closely matches expectations based on ISH characterization of tdTomato  
227 expression in Cre x Ai14 reporter lines for these regions<sup>23</sup> (<http://connectivity.brain-map.org/transgenic>).

228 From any given source, cortical projections labeled in the L5 Rbp4-Cre\_KL100 line (middle column in  
229 **Figure 3b-f**) appear to be more extensive than from any other line or layer. However, it is also visually  
230 obvious that the projections labeled in different Cre lines originating from the same location had very  
231 similar projection patterns overall (looking across rows). Indeed, it appears that the projections from every  
232 other spatially-matched Cre line are a subset of the L5 outputs. Of note, the predominantly subcortical  
233 projecting (see **Figure 1b**) L5 PT and L6 CT lines (3 columns on the right) also have varying amounts of  
234 intracortical projections, which are still a subset of those mapped from L5 IT and pan Cre lines.

235 To quantitatively explore how similar, or different, cortical projection patterns are across cell classes from  
236 the same location, we first manually curated the complete anchor group dataset ( $n=43$  anchors, 364  
237 experiments). This was accomplished by careful visual inspection of the corresponding high-resolution 2D  
238 images for all possible cortical targets to identify true positive and true negative connections from each  
239 experiment (43 ipsilateral and 43 contralateral targets, for a total of 31,304 connections manually  
240 checked, data provided in **Supplemental Table 3**). We also noted when a target contained only fibers of  
241 passage, and considered it as a true negative for subsequent binarization of the matrix. Using the output  
242 of our automated segmentation and registration algorithms we generated multiple weighted connectivity  
243 matrices, one for each Cre line, and applied the manually curated binary mask to remove all true negative  
244 weights (*i.e.*, segmentation artifacts). As mentioned above, only 25 different cortical areas were  
245 represented in the 43 anchor groups. This was due to both denser spatial sampling within a larger  
246 structure (e.g. we targeted 6 retinotopic locations within primary visual cortex, 3 sub-regions in secondary  
247 motor and 2 in the ventral part of anterior cingulate), and the replication of experiments in several visual  
248 locations with the SypEGFP virus. To avoid biases related to differences between source areas, we  
249 selected only one anchor group per cortical region, if there was a significant, positive correlation between  
250 Rbp4-Cre\_KL100 replicates (Spearman  $r > 0.8$ ). Following this selection, we present the results from 27  
251 anchor groups, consisting of 25 unique areas and two locations in MOs and SSs. Eight of the lines  
252 representing each layer/class with the most experiments in these 27 groups are shown in **Figure 4a**  
253 (underlying data from these and the other 6 Cre lines provided in **Supplemental Table 3**). Of note, we  
254 merged the data from C57BL/6J and Emx1-IRES-Cre experiments into one matrix, as these both account  
255 for outputs of all projection neurons across layers in a cortical region. In support of this compilation, we  
256 also found that cortical projection patterns between pairs of spatially-matched Emx1-IRES-Cre and wild  
257 type experiments in 3 different regions were highly correlated, even given locations in opposite  
258 hemispheres (Spearman  $r = 0.88$  for VISp, 0.90 for VISl, and 0.97 for VISam, **Supplemental Figure 6**).

259 Overall, these matrices reveal several similar and unique features of projection neuron class-specific  
260 connectivity between areas in terms of number, strength, and specificity of connections. First, we  
261 quantified the number of output connections ("out-degree") for each experiment. Variation in out-degree  
262 by source area in each line is shown in **Supplemental Figure 7a**. To assess for differences across lines,  
263 we calculated the average out-degree in both hemispheres (**Figure 4b**). Overall, we find a significant  
264 effect of both Cre line and hemisphere (but not the interaction) on the number of connections (2-way  
265 ANOVA,  $p < 0.0001$ ). The mean numbers of C57BL/6J/Emx1-IRES-Cre connections are not significantly  
266 different from Rbp4-Cre\_KL100 or Tlx3-Cre\_PL56 in either hemisphere, but are significantly higher than  
267 all other Cre lines (Tukey's multiple comparison test,  $p < 0.0001$ ), except for Rorb-IRES-Cre on the  
268 ipsilateral side. Similarly, Rbp4-Cre\_KL100 also had significantly more connections on both ipsilateral and  
269 contralateral hemispheres compared to every other line, except for Tlx3-Cre\_PL56 on the contralateral  
270 side. As also seen in the matrices, the L5 PT and L6 CT lines have the fewest number of connections to  
271 regions in both hemispheres, followed by the L2/3, L4, and L5 IT lines. **Figure 4b** also shows that for  
272 every line, there are fewer contralateral connections compared to ipsilateral connections.

273 **Figure 4a** and **b** show that L5 Rbp4-Cre\_KL100 labeled cells project most widely, and are most like wild  
274 type experiments for any given source. **Figure 3b-f** also shows that the connections from each line  
275 appear to be a subset of the Rbp4-Cre\_KL100 patterns, as opposed to a different set of target regions.  
276 So, next we determined how much overlap there was between the specific targets contacted by each  
277 experiment and the Rbp4 anchor within the spatially-matched groups (**Figure 4d**). C57BL/6J/Emx1-IRES-  
278 Cre and Rbp4-Cre\_KL100 shared, on average, 80% of the targets from any given source. A roughly  
279 equal number of targets are unique to either Rbp4-Cre\_KL100 or C57BL/6J/Emx1-IRES-Cre (12.7%, 7%)  
280 which may be due to differences in sensitivities of the viral tracers, or the homozygosity of the Emx1-  
281 IRES-Cre line. For every other Cre line, all target connections were a subset of the L5 Rbp4 targets  
282 (**Figure 4c** white bars, <5% of the targets are unique to any Cre line). Together, it appears that L5 cells  
283 project to almost all possible targets from any given source. Within L5, the L5 IT cells have the most  
284 overlap with Rbp4-Cre\_KL100 while L5 PT cells have more limited projections within the Rbp4 set, and  
285 predominantly to the ipsilateral hemisphere (**Figure 3b-f and 4a**). L2/3 (and L4) IT cells project to a  
286 subset of the same targets of L5. Fewer projections to the contralateral hemisphere appear to account for  
287 most of the differences between L2/3 and L5 (**Figure 4b**), suggesting that most callosal projections arise  
288 from L5 in the mouse.

289 Next, we looked at the strength of connections made by the projection neurons labeled in each line  
290 (**Figure 4c**). After removal of the manually verified true negative connections, individual output strengths  
291 still spanned ~5 orders of magnitude, like previously reported for both outputs and inputs in mouse and  
292 macaque brains<sup>4,36,37</sup>. Projection strengths were positively correlated ( $r=0.43$  to  $0.89$ ) between all pairs of  
293 Cre lines from the same anchor group (**Supplemental Figure 8**). Overall, we find a significant effect of  
294 Cre line and hemisphere, and the interaction of these two factors, on the strength of connections (2-way  
295 ANOVA,  $p<0.0001$  for Cre line and hemisphere,  $p=0.02$  interaction effect). Across all lines, the average  
296 projection strengths are stronger within the ipsilateral compared to contralateral hemisphere (**Figure 4c**).  
297 This overall pattern was also observed across individual sources within each line (**Supplemental Figure**  
298 **7b**). The largest disparities in strength across hemispheres is seen in the L5 PT (blue) and L6 CT lines  
299 (yellow). In other words, not only do these lines contact few targets contralaterally (<5, **Figure 4b**), but,  
300 when axon terminals are present, they are ~1 order of magnitude weaker than the ipsilateral side  
301 connections.

### 302 *Axon terminal lamination patterns and their relationship to source layer and cell class.*

303 L5 neurons make connections to essentially all the targets of that source area, and all other layers  
304 contact a subset of these targets. Next, we looked at whether projection class-specific differences exist in  
305 the targets at the level of layers.

306 First, we visually inspected and described the relative densities of axon terminal labeling across layers for  
307 all targets in a subset of the Rbp4 anchor group experiments (79 of 364 experiments covering 14 source  
308 areas in all 15 lines; total=6,794 connections checked for layer patterns, true negatives then removed).  
309 Several frequently observed patterns emerged from this subset of representative experiments (**Figure 5a-**  
310 **j**). The four most common lamination patterns include: (a) columnar, with relatively equal densities across  
311 all layers (21%), (b) superficial and deep layers in equal densities (18%), (c) superficial layers only (25%),  
312 or (d) deep layers only (18%). The remaining patterns observed (e-j) together account for 19% of all true  
313 positive connections. Of note, almost all patterns involved dense terminals in L1, except for three rare  
314 patterns (e, i, j; 2-4%), which were distinctive in that L1 contained relatively few labeled axons.

315 Following the qualitative assignment of axon terminals to a lamination pattern as shown, we checked  
316 whether informatically-obtained values of projection strength by layer, derived following registration to the  
317 Allen CCF, could quantitatively capture these patterns. The inset bars in **Figure 5a-j** show the average  
318 fraction of the total projection volume per layer, scaled by the relative size of the layer in each target. We  
319 used the actual ratio of each layer's volume per target for scaling because this number varies across  
320 cortical areas (e.g. some areas have large L4, others very small). The resulting heat map in each panel  
321 visually corresponded well to the qualitative classifications of laminar patterns.

322 We next performed unsupervised hierarchical clustering, for the *complete* dataset of **Figure 1a**, to  
323 visualize laminar termination patterns from all source areas and Cre lines. In the heatmap shown in  
324 **Figure 5k**, each column is a unique combination of mouse line, source area and target. Relative density  
325 data were calculated as just described (*i.e.*, the fraction of the total projection in each layer, scaled by  
326 relative layer size). Data included for clustering had to pass three filters. (1) target connection strength  
327 (log<sub>10</sub>-transformed normalized projection volume) was greater than -1.5. This threshold was chosen  
328 based on the frequency distributions for informatically-derived normalized projection volumes of the set of  
329 manually-verified true positive and true negative connections (**Supplemental Figure 10**). At a log<sub>10</sub>  
330 connection strength of -1.5, the number of true positives was first larger than true negatives. Less than  
331 3% of true negative values remain, while over 50% of true positives are still present. (2) The percentage  
332 of infection volume in the primary source was > 50%, and (3) self-to-self projections were removed.  
333 Following these steps, if present, multiple experiments with the same source-line-target were averaged,  
334 resulting in a total of 6,469 unique source-line-target connections in **Figure 5k**.

335 We performed unsupervised hierarchical clustering on the relative density of projections in L1, L2/3, L4,  
336 L5, and L6a using Spearman rank correlations, and average linkages, to measure similarities. The first  
337 dendrogram branch point split the targets based on the density of projections to L6a (low on the left, high  
338 on the right). Then, within each of these two clusters, the next split was made by relative projection  
339 density in L1. The third split was determined by L2/3 relative projection density. At this point, 6 clusters  
340 were identified which resembled the manual categories, and we discuss each of these patterns further.  
341 The median values for each layer and the overall frequencies of these clusters are shown in **Figure 5l,m**.  
342 Clusters 1-3 had relatively weak projections to L6a compared to clusters 4-6. **(1)** Cluster 1 most  
343 resembled the superficial layer pattern (**Figure 5c**), with dense projections in L1 and/or L2/3 (n=1,777,  
344 27%). **(2)** Cluster 2 resembled the L1+L5 pattern (**Figure 5g**; n=314, 4.9%). **(3)** Cluster 3 resembled two  
345 of the patterns avoiding L1 and L6 (**Figure 5e,j**, n=499, 7.7%), preferentially projecting into L2/3, L4 (if  
346 present), and L5. Unlike clusters 1-3, clusters 4-6 had high projection density to L6a. **(4)** Cluster 4 was  
347 the largest group (n=1,982, 31.0%) and most like the superficial and deep layer pattern (**Figure 5b**).  
348 Cluster 4 is also likely to contain the targets with lamination patterns visually described as “columnar” and  
349 “polylaminar” (**Figure 5a,f**), although even for those there does appear to be stronger projection density  
350 to L1 and L6 (see insets in a,f). **(5)** Cluster 5 targets were most densely innervated in L2/3 and L6a, like  
351 the pattern shown in **Figure 5i** (n=778, 12.0%). **(6)** Cluster 6 targets were most densely innervated in  
352 deep layers like in **Figure 5d** (L5 and L6a, n=1,119, 17.3%). All 6 of these broad classes of lamination  
353 patterns occurred in targets on the ipsi- and contra-lateral hemispheres at similar frequencies to the  
354 overall ratio of the number of ipsi- and contra-lateral targets (68.77% ipsilateral, **Figure 5n**).

355 Next, we wanted to determine the relationships (if any) between these laminar patterns and the Cre lines  
356 which label neurons of different layer-specific projection classes. For each mouse line, we calculated the  
357 relative frequency of that line in each cluster, divided by the overall relative frequency of each Cre line in  
358 the entire dataset. **Figure 5o** shows that the projections labeled in each mouse line have more than one  
359 type of target layer pattern (*i.e.*, very few of the boxes are 0, or colored dark green). However, for most  
360 lines, 1-3 layer patterns were identified that occur most frequently (pink-magenta). First, projections  
361 labeled following tracer injections into C57BL/6J and Emx1-IRES-Cre mice, which label the outputs of all  
362 layers and all classes together, are found with roughly equal frequencies in clusters 4,5, and 6 (all  
363 involving dense targeting to L6). The two L2/3 IT lines, Cux2-IRES-Cre and Sepw1-Cre\_NP39 are most  
364 associated with cluster 3, as is one of the L4 IT lines, Nr5a1-Cre. In contrast, experiments from the other  
365 two L4 IT lines, Rorb-IRES-Cre and Scnn1a-Tg3-Cre, which had some selectivity for L5 as well as L4  
366 (**Supplemental Figure 2**) occur with higher than expected frequencies in clusters 1 and 2. The L5 pan-  
367 class line, Rbp4-Cre\_KL100, is most associated with clusters 4 and 5, but the L5 IT line, Tlx3-Cre\_PL56  
368 is strongly associated with cluster 1. All four L5 PT lines were associated strongly with cluster 2, and three  
369 of these were also identified at higher than expected frequencies in cluster 6 (A93-Tg1-Cre, Sim1-  
370 Cre\_KJ18, and Efr3a-Cre\_NO108). The L5 PT line Chrna2-Cre\_OE25, on the other hand, had relatively  
371 more projections of the cluster 4 type. Finally, L6 CT lines, Ntsr1-Cre\_GN220 and Syt6-Cre\_KI148, were



372 like L5 PT lines in that they each had high relative frequencies of projections assigned to cluster 2 and 6  
373 patterns.

374 The *most common* (but not all) laminar patterns from each Cre line are schematized in **Figure 5p**. In  
375 summary, L2/3 and L4 (Nr5a1) source neurons project predominantly to the middle layers in a target  
376 (L2/3, L4, and L5), avoiding L1. Other L4 source neurons project to L1 and either L2/3 or L5, avoiding L4  
377 and L6. In L5, when both IT and PT classes are labeled, as in the Rbp4-Cre\_KL100 line, projections  
378 target L6 and *either* L1 or L2/3. L5 IT source neurons predominantly target superficial layers (L1 and  
379 L2/3). L5 PT source neurons target either deep layers only (L5 and L6) or deep layers and L1, consistent  
380 with the L5 Rbp4-patterns representing both IT and PT patterns. L6 CT source neurons project to L1 and  
381 L5 or deep layers only.

### 382 *Anatomical rules for determining hierarchical position in mouse isocortex.*

383 Anatomical patterns of connections derived from anterograde and retrograde tracing data have been  
384 used to describe the hierarchical relationships between cortical areas for decades<sup>12,26,38,39</sup>. In the  
385 schemes based on the macaque monkey visual cortex, different lamination patterns correspond to  
386 feedforward, feedback, and lateral connections between pairs of areas. Briefly, feedforward connections  
387 were characterized by densest terminations in L4, feedback by the preferential avoidance of terminals in  
388 L4, usually with denser projections in both superficial and deep layers, and lateral connections  
389 characterized by having relatively equal density across all layers, including L4<sup>12</sup>. The fraction of  
390 retrogradely labeled cells in supragranular layers has also been used as a continuous variable index of  
391 hierarchical position in macaque cortex<sup>39</sup>.

392 Here, we observed some obvious similarities between the previously published laminar patterns derived  
393 from anterograde tracing data and our results, particularly for the feedback projection pattern. In our view,  
394 clusters 2 and 4 projection patterns (most like **Figure 5g** and **Figure 5b**, respectively) are most like the  
395 feedback rule described by Felleman and van Essen (1991). These patterns avoid L4, strongly targeting  
396 L1 and either L5 or L6 and can arise from neurons in all layers and classes (**Figure 5o**). However, we did  
397 not see a pattern emerge, either through unsupervised clustering or from the manual inspection, exactly  
398 like the feedforward projection rule of Felleman and van Essen (*i.e.*, preferentially targeting L4). The most  
399 similar projection pattern to a feedforward rule is seen in cluster 3 (most like **Figure 5e,j**), which involves  
400 projections into L2/3, L4, and L5, arising most often from L2/3 and one L4 IT class (Nr5a1 only, **Figure**  
401 **5o**). The sparsity of projections into L1 with denser signal in mid layers is consistent with an index of  
402 feedforward connections recently described for mouse visual cortex<sup>40</sup>, and suggests that cluster 5 may  
403 also be a feedforward pattern in the mouse. Two patterns without an obvious match to previous literature  
404 were the superficial layer only projections in cluster 1 and the deep layer-only projections in cluster 6.  
405 Both patterns may be feedback because they do not involve mid-layers. Indeed, it was noted in Felleman  
406 and van Essen (1991) that the superficial only pattern was occasionally seen, and they grouped them  
407 with the feedback pattern because it did not involve L4. Also, of note, in the tracer experiments where all  
408 projection neuron classes were labeled (C57BL/6J/Emx1-IRES-Cre) the most common patterns were 4,  
409 5, and 6. Based on the above descriptions, these would also support the identification of both feedforward  
410 (cluster 5) and feedback (cluster 4 and 6) types between areas when all neuron projection patterns  
411 between a given source-target are compiled.

412 To determine whether the tentative assignments of layer patterns to feedforward or feedback connections  
413 were consistent with past results and assumptions, we looked at specific pairs of connections where  
414 hierarchical relationships have previously been explored or intuited in rodents. **Figure 6** shows two  
415 examples of reciprocally connected pairs of areas within unimodal sensory regions (visual and  
416 somatosensory cortex) that are considered lower (primary) and higher (secondary) in a hierarchy. All  
417 projections out of VISp to higher visual areas are generally described as feedforward, whereas the  
418 reverse (to VISp from higher visual areas) are feedback<sup>26,41-43</sup>. We directly compared the axon projection  
419 patterns originating from neurons in different layers and classes in these examples using the spatially  
420 matched groups of experiments described in **Figures 3** and **4**. In the feedforward direction (VISp to VISal,



421 **Figure 6a**), projections from VISp terminated with different layer patterns depending on the Cre-defined  
422 cells of origin. L2/3, L4, and L5 IT projections were densest in L2/3-L5 of VISal, and relatively sparse in  
423 L1 and L6. These connections were assigned to cluster 3. Rbp4-Cre\_KL100 projections from VISp to  
424 VISal were densest in L2/3, L4 and L6, characteristic of cluster 5. The L5 PT and L6 CT cells projected to  
425 L1 and L5 (cluster 2). In the opposite direction (VISal to VISp, **Figure 6a**), patterns were often different  
426 from the corresponding reciprocal layer-specific projections. From VISal L2/3 IT cells, axons were  
427 distributed across all layers, with a sparser region in L5 (cluster 4). There was also a weak projection from  
428 L4 IT cells in VISal to VISp, with terminals in L1 and L5/6 (cluster 4). The projection originating from L5 IT  
429 cells ended predominantly in superficial layers (cluster 1), while the Rbp4-Cre\_KL100 labeled axons from  
430 VISal to VISp were dense in L1 and deep layers (cluster 4). Again, projections from L5 PT and L6 CT  
431 cells were sparse, but present in both L1 and L6 (cluster 4). Overall, more of the projections in the  
432 feedforward direction involved middle layers, with sparser terminations in L1.

433 In the somatomotor module (**Figure 6b**), we focused on projections between a primary (SSp-m) and  
434 secondary (SSs) area as another example of a reciprocal feedforward (SSp-m to SSs) and feedback  
435 (SSs to SSp-m) connection. Like for the visual pair, projections from L2/3 and L4 IT cells preferentially  
436 innervated L2/3-L5, with relatively sparser terminals in L1 and L6. Both L5 IT and Rbp4-Cre\_KL100  
437 projections strongly innervate L1 and upper L5, unlike the VISp to VISal feedforward connection from L5  
438 IT cells, which avoided L1. L5 PT and L6 CT cell projections were sparse, and to deep layers (cluster 6).  
439 In the reverse direction (SSs to SSp-m), the patterns looked remarkably like the layer-specific feedback  
440 projections from VISal to VISp. L2/3 IT cells terminated densely in mid layers (but appeared more diffuse  
441 across the entire column), but the other lines containing IT cells all had similar projections to superficial  
442 and deep layers. One very striking result from laying out the projection patterns originating from different  
443 layers is in the Scnn1a-Tg3-Cre: L4 IT column. For both examples (visual and somatomotor), there is a  
444 very strong connection originating from L4 cells in the lower area that preferentially terminates in mid-  
445 layers of the higher area. This is clearly not the case in the reverse direction (higher to lower area). Two  
446 additional examples of reciprocally connected areas within different modules (medial: RSPv to VISam and  
447 prefrontal: ORBl to MOs) are shown in **Supplemental Figure 11**. These generally follow the same  
448 patterns described above, including the obvious difference in strength and layer pattern in the L4 IT  
449 projection between reversed directions.

450 We next looked at the layer-specific projection patterns between reciprocally connected areas assigned to  
451 different network modules. The anterior cingulate cortex (ACA) exerts top-down control of sensory  
452 processing in VISp<sup>44,45</sup>. We thus assume that the intermodule connection from VISp to ACAd is  
453 feedforward, and ACAd to VISp is feedback (**Figure 7a**). In contrast to the intramodule feedforward  
454 connections in **Figure 6** and **Supplemental Figure 11**, there is remarkable similarity in the target layer  
455 patterns arising from L2/3, L4, and all classes of L5 cells. These all preferentially innervate L1 in ACAd  
456 (cluster 1). In the feedback direction (ACAd to VISp), L2/3 cells also predominantly terminate in L1, but L5  
457 cells project to both L1 and deep layers (L5 and L6, cluster 4), consistent with previous reports<sup>44</sup>. There  
458 may also be a sub-layer distinction in these L1 terminals. Axons from VISp to ACAd seem to be relatively  
459 deeper in L1 of ACAd, compared to the more superficial termination of ACAd axons in L1 of VISp. In  
460 **Figure 7b**, we present images showing laminar termination patterns arising from the different cell  
461 layer/classes between primary (MOp) and secondary (MOs) motor cortex, which we assigned here to the  
462 somatomotor (MOp) and prefrontal (MOs) modules based on their overall connectivity strengths with the  
463 other cortical areas. MOp is generally considered to be at a lower hierarchical level than MOs, although  
464 MOp is also the final output of the cortex driving voluntary control of behavior. All the IT cells from MOp to  
465 MOs appear to have more characteristics in common with intramodule feedforward connections  
466 (superficial layers, with sparse terminations in L1), including labeled axons from the predominantly L4  
467 line. From MOs to MOp, there is more involvement of L1 in all patterns, and the L5 IT pattern includes  
468 deep and superficial layers like the Rbp4-Cre\_KL100 experiment.

469 In summary, within a module, feedforward and feedback projections are consistent with the tentative  
470 assignments to cluster/layer pattern described above. Feedforward projections have more target patterns

471 in clusters 3 and 5, feedback in clusters 2, 4 and 6. The relationship of cluster 1 to feedforward or  
472 feedback is less clear in these intramodule examples, although results in **Supplemental Figure 11** would  
473 support this pattern as feedforward, even with the L1 involvement. The intermodule connections from  
474 ACAd to VISp further support characterization of the cluster 4 layer pattern (superficial and deep,  
475 avoiding L4) as feedback, and, somewhat of a surprise, the cluster 1 pattern (superficial layers) as  
476 feedforward. Also, in all cases, projections from L5 PT and L6 CT neurons, when present, appear to be of  
477 the feedback type regardless of the overall top/down direction.

478 Taken together, these data suggest that the assignment of “feedforward” and “feedback” to specific  
479 connections between any pair of areas should account for all the contributions from each source layer,  
480 and the overall mix of target lamination patterns for a given connection (see also **Supplemental Figure**  
481 **12** showing this concept, with more detail below).

482 Based on the anatomical analyses as described, we grouped the observed target layer patterns into  
483 either feedforward (clusters 1,3,5) or feedback (clusters 2,4,6) (**Figure 8a**). Quantification of the relative  
484 frequency of these patterns for intra- and inter-module connections showed that clusters 1 and 4 occurred  
485 more often than expected in intermodule connections; clusters 3, 5, and 6 were identified more often in  
486 intramodule connections (**Figure 8b**), consistent with data in **Figure 6** and **Figure 7**. All source modules  
487 had relatively high frequencies of the feedforward pattern described by cluster 3 for their intramodule  
488 connections (**Figure 8c**). Between modules (**Figure 8d**), visual, temporal, and somatomotor were strongly  
489 associated with the superficial lamination pattern of cluster 1, which we classified as feedforward.  
490 Prefrontal connections were relatively more frequently assigned to cluster 4 (feedback), and all other  
491 modules occurred more often than expected in cluster 5 (feedforward).

#### 492 *Unsupervised hierarchy of all cortical areas from layer termination patterns*

493 We next determined whether it was possible to use the layer termination patterns from the layer-specific  
494 projection neuron classes defined by the Cre lines to define a direction of information processing  
495 throughout ipsilateral cortex. We defined hierarchical position for a cortical source area as the number of  
496 feedback connections originating from this area minus the number of feedforward connections, divided by  
497 their sum. Each connection was also normalized by a confidence level for the Cre line in providing  
498 information about the direction (see equations 1 and 2 in the methods). Similarly, the position in the  
499 hierarchy as a target is the normalized number of feedforward minus feedback connections terminating in  
500 the target. Each of these measures is bounded between -1 to 1. We used the sum of these measures as  
501 the hierarchical position (see equation 3 in the methods, possible range then becomes -2 to 2). Individual  
502 pair-wise measures for each connection, based on the clustering assignments to target lamination pattern  
503 types, are shown in **Supplemental Figure 12**. This matrix represents the concept of a “multigraph”, in  
504 that there are many possible edges between two nodes (e.g. each of the 13 Cre lines), and all information  
505 is used when searching for the optimal hierarchical positions. We searched over all possible mappings  
506 between the layer pattern type (the 6 clusters above) and feedforward and feedback assignments, and  
507 checked the self-consistency for every assignment. For the whole cortex assignment, the highest self-  
508 consistency (see equation 4 in methods) was obtained when clusters 1,3 and 5 were assigned to one  
509 type, and 2, 4 and 6 to the opposite. These are the *same* classifications derived from the above  
510 anatomical analyses, providing an example of how the human brain is an excellent unsupervised  
511 hierarchy discoverer.

512 Hierarchical positions of 37 (of the 43 parcellated) cortical areas are presented in **Figure 8e** (AUDv, GU,  
513 PERI, and ECT did not have data that passed thresholding; VISC and SSp-un were additionally removed  
514 for having only n=2 connections from 1 Cre line). By this measure, primary visual cortex (VISp) is at the  
515 bottom and the dorsal part of anterior cingulate cortex (ACAd) at the top. Areas were color coded by  
516 module assignment, which reveals a general pattern for prefrontal areas (red) to be higher in the  
517 hierarchy, and unimodal sensory regions (VISp, SSp, AUDp) to be closer to the bottom. For the entire  
518 cortex, the global hierarchy score (see equation 4 in methods) is 0.128 (range 0 to 1). Therefore, while we  
519 find a global hierarchy, there are still many connections for which a hierarchical organization may not

520 provide a full explanation. We performed the same analyses on intramodule connections separately.  
521 Here, we observed a hierarchy score of 0.51 for the temporal, 0.33 for the visual module, 0.31 for  
522 anterolateral, 0.12 for medial, 0.09 for somatomotor, and 0.03 for prefrontal, given the same pattern  
523 assignments to feedforward (1,3,5) or feedback (2,4,6). The range in values suggests that different  
524 schemes, or different assignments of connections to feedforward and feedback, may better describe  
525 organization of connectivity within different modules. We also determined the relative order of all 10 visual  
526 areas, which span two modules here (visual and medial, colored blue and purple, respectively). Previous  
527 analyses based on tracer experiments in the mouse have mapped these areas into ventral and dorsal  
528 streams<sup>46</sup>. A representation of their hierarchical positions overlaid onto a weighted network diagram is  
529 shown in **Figure 8h** (dorsal stream areas on the right, ventral on the left of the circle). The edge weights  
530 in the network diagram are derived from the matrix of **Figure 2b**, and nodes are ordered from bottom to  
531 top (VISp, VISl, VISpl, VISrl, VISal, VISli, VISa, VISpm, VISpor, and VISam).

### 532 *Hierarchy of cortical network modules*

533 We also determined the overall “feedback-ness” of each module’s ipsilateral outputs (as opposed to the  
534 individual nodes/areas) by measuring the number of feedback minus feedforward patterns, divided by  
535 their sum for every module as a source to all other modules (**Figure 8f**). Then, we calculated the  
536 difference between these feedback fractions for every pair of modules in both directions to obtain a single  
537 measure (the intermodule hierarchy index) predicting the forward/back relationship between each pair  
538 (**Figure 8g**). From this plot, it is obvious that the prefrontal module is above all other modules (e.g., every  
539 circle plotted for prefrontal as a source on the y-axis is positive on the x-axis). Conversely, the  
540 somatomotor module is below all other modules. We thus anchored the hierarchy at the top and bottom  
541 with prefrontal and somatomotor modules. **Figure 8i** shows a network diagram with each module  
542 collapsed into a single node. Edges are the sum of all the weights between modules from **Figure 2b**. The  
543 modules were positioned from top to bottom based on the data points in **Figure 8g**. Remarkably, the  
544 order is self-consistent at all levels given the available data. We did not have enough data or connections  
545 between anterolateral and medial, and anterolateral and visual modules to confirm these positions,  
546 however these are also the weakest of the intermodule connections (thinnest lines in **Figure 8i**). The  
547 combination of layer/class-specific projection patterns between network modules thus enabled the  
548 prediction of a consistent hierarchical framework for cortical information processing, with three modules  
549 containing primary sensory regions at the bottom (somatomotor, temporal, and visual), progressing to  
550 higher levels with modules containing more associational areas (medial, anterolateral) and ending in the  
551 prefrontal cortex.

### 552 *Discussion*

553 Here we used a genetic tracing approach, building on our previously established viral tracing, whole brain  
554 imaging, and informatics pipeline, to map projections originating from unique cell populations in the same  
555 cortical area. Two key features of our high-throughput connectivity mapping pipeline are the automated  
556 segmentation of fluorescent signal, from which we calculate measures of long-distance projection  
557 strength between areas, and the registration of every experiment to our fully annotated 3D mouse brain  
558 reference atlas, the Allen CCF. Jointly, these methods enabled a comprehensive yet detailed view of  
559 mesoscale cortical wiring patterns, and the derivation of several general anatomical rules of long-range  
560 intracortical connections. Specifically, we show: (1) network analysis of intracortical connectivity patterns  
561 reveals a modular organization of cortical areas, (2) L5 neurons in any given source area make the most  
562 connections, and neurons in L2/3, L4, and L6 project to a subset of these L5 targets, (3) intracortical  
563 target lamination patterns are diverse, but at a coarse-grained level are related to layer of origin and are  
564 like previously described anatomical rules for defining feedforward/feedback connections, (4) projections  
565 originating from specific source layers/classes and target layer patterns together can define a single  
566 direction of information flow (*i.e.*, a hierarchy) between cortical areas and between network modules, with  
567 primary sensory areas and related modules at the bottom, and prefrontal areas at the top.

568 Our previously generated whole brain mesoscopic connectome provided a comprehensive, directed, and  
569 quantitative connectivity map between areas of the mouse cortex<sup>4</sup>. In the current study, we used these  
570 data and a novel voxel-based model<sup>31</sup> to provide a macroscale organizational framework for viewing  
571 cortical areas as networks of connections. Through community detection analysis of the ipsilateral  
572 intracortical connectome, we identified six modules. The **first** module (“prefrontal”) consisted of cortical  
573 areas in predominantly frontal, agranular regions strikingly similar to those recently proposed as the  
574 mouse prefrontal cortex<sup>47</sup>. Very broadly, the function of the prefrontal cortex is cognition, and it is likely  
575 that the connections into and out of this module enable the necessary information flow for incoming  
576 sensory and behavioral state input that influence voluntary control of behavior. Indeed, there is relatively  
577 strong output from this module to primary motor cortex (MOp, **Figure 2b**), and strong input to secondary  
578 motor cortex (MOs) from many regions in other modules. The **second** module (“anterolateral”) included  
579 all three agranular insular subregions, plus gustatory and visceral cortex, consistent with a role for insular  
580 cortex in integration of taste and body homeostasis/energy needs<sup>48,49</sup>. At lower levels of spatial resolution  
581 ( $\gamma < 1$ ) these areas were part of a larger sensory module together with our **third** module (“somatomotor”).  
582 The somatomotor module contained all the primary somatosensory regions, secondary somatosensory  
583 cortex, and MOp. All SSp divisions project to SSs and MOp, and to MOs, which is in the prefrontal  
584 module. Although the MOp is not sub-parcellated in the Allen CCF, our projection mapping data show that  
585 projection domains are preserved in MOp when originating from the different SSp domains (*i.e.*, there are  
586 specific terminal fields in MOp for barrel field, trunk, lower limb, upper limb, nose, mouth), as previously  
587 reported<sup>3</sup>. The **fourth** module (“visual”) contained primary visual cortex and six out of nine higher order  
588 visual areas. The remaining three visual areas (VISa, VISam, and VISpm) were grouped with the three  
589 retrosplenial cortex subregions (RSPagl, RSPd, RSPv) into the **fifth** module (“medial”). At lower spatial  
590 resolution, these two modules (visual and medial) consistently merged into one, reflecting the high  
591 connectivity strengths between all visual areas. However, the medial module areas are more strongly  
592 connected to prefrontal areas (particularly ACAd, ACAv, and ORBvl). The **sixth** module (“temporal”)  
593 contained both auditory sensory regions (AUDp, AUDd, AUDv, AUDpo) and associational cortical areas,  
594 perirhinal (PERI), ectorhinal (ECT), and temporal association cortex (TEa). This combination is the least  
595 intuitive of all these modules, and may be a consequence of limitations in the underlying dataset.  
596 Specifically, in only one experiment did we successfully label projections from ECT cortex (shown in  
597 bottom right panel, **Figure 2a**), and so the voxel-based model had very little information to use for  
598 prediction of connection strengths<sup>31</sup>.

599 Within these modules and areas, we identified generalizable layer-specific intracortical projection  
600 patterns. For a given cortical source area, L2/3, L4, L5 PT, and L6 CT cells project to a subset of the  
601 target regions contacted by L5 neurons. Notably, all the excitatory neuron classes we surveyed had  
602 intracortical projections labeled outside of the infection area, including the L4 IT and subcortical PT and  
603 CT projection neurons. This somewhat unexpected result could be caused by Cre lines with less than  
604 perfect specificity. However, we also found that when long-distance projections are present from PT or CT  
605 cells, they have distinct termination patterns compared to the IT lines. These projection patterns were  
606 consistent with characteristics of feedback pathways, even in connections that were overall feedforward.  
607 A feedback collateral arising from deep layer subcortical-projection neurons may thus be another  
608 generalizable feature of PT and CT intracortical axons<sup>50</sup>.

609 The strength and presence of projections between areas from the predominantly L4 Cre lines was also  
610 unexpected. Canonical circuits, mostly derived from primate and cat, do not include inter-areal L4  
611 excitatory neuron projections<sup>51</sup>. The three Cre lines used here had varying degrees of selectivity for L4  
612 expression (**Supplemental Figure 2**), with some expression in L5 for both the Scnn1a-Tg3-Cre and  
613 Rorb-IRES-Cre lines. These two Cre lines also contain cells classified into both L4 and L5a types based  
614 on transcriptomics; while the Nr5a1-Cre line appears most specific to L4 cell types<sup>15</sup>. Thus, it is difficult to  
615 definitively conclude that these inter-areal projections originate from L4 rather than L5. Differences in the  
616 number of connections and the specificity of these inter-areal connections suggest that if the origin is in  
617 L5, they are at least a unique subclass of projection neurons. It is also worth noting that although the



618 prefrontal and some other areas in the cortex are considered “agranular”, *i.e.*, lacking a distinct L4, Cre  
619 expression is often still detectable, though much sparser, in the so-called L4 lines used here.

620 Classic definitions for PT and CT cell classes exclude contralateral cortical projections<sup>20</sup>, roughly  
621 consistent with our observations. However, our data also showed that for some source areas, particularly  
622 in the prefrontal module, PT and CT lines had labeled axons that crossed the callosum, terminating in a  
623 small number of contralateral cortical targets. Overall, most callosal projections were made by neurons in  
624 L5, and, to a lesser extent, L2/3 and L4 Cre lines, consistent with expectations from previous results<sup>52</sup>.  
625 The number of ipsilateral connections made by L2/3 IT cells was similar to L5 IT cells; however, there  
626 were significantly fewer connections on the contralateral side. A recent analysis of the rat macroscale  
627 cortical connectome identified a set of general rules regarding ipsilateral (associational) and contralateral  
628 (commissural) connections that are mostly consistent with our observations; namely that all cortical areas  
629 have more associational than commissural targets<sup>8</sup>. The mesoscale connectome data we present here  
630 reveals that some of these differences can be better explained at the level of cell class.

631 Cortical areas are densely interconnected, and projections arise from all layers. Here, we first present an  
632 organizational scheme, the network, that groups cortical areas based on the strength of their connections.  
633 This kind of network view of cortical organization presents a structural view of all possible paths of  
634 information flow between areas and modules, but does not impose a direction or order on that flow.  
635 Another very influential organization scheme is the cortical hierarchy. The existence of a hierarchy implies  
636 classifying inter-areal connection types into at least two general classes: feedforward or feedback. From  
637 the macaque brain, studies have demonstrated that specific anatomical projection patterns between  
638 areas are characteristic of either a feedforward or feedback connection<sup>12,13</sup>. These primate rules were  
639 applied to build the visual cortex hierarchy that has inspired multiple computational models of cortical  
640 function<sup>12</sup>. Several models assign feedforward connections for information processing, and feedback  
641 connections as carrying a learning signal<sup>14,53</sup>. Another popular model for cortical computations is  
642 predictive coding<sup>54</sup>, in which feedforward connections represent an error signal, while feedback  
643 connections represent predictions, and local circuits integrate them<sup>55</sup>.

644 Partial hierarchies of the visual cortex exist for rodents, also based on anatomical projection patterns from  
645 anterograde tracing studies<sup>26,40,56</sup>. Differences between those patterns used in the primate were noted,  
646 and re-classified for rodent. Specifically, feedforward connections were characterized by having less  
647 dense axon terminations in L1 compared to L2/3, but axon terminals still spanned L2/3 to L5 evenly<sup>40</sup>.  
648 Feedback avoided L4 (like for the primate), terminating most densely in L1 and L6. We noted the same  
649 kinds of patterns in visual cortex feedforward and feedback connections. Whether these patterns can be  
650 extended to other sensory, motor, and associational modules (including those with “agranular” cortex<sup>57</sup>)  
651 was less clear from previous studies. Our analysis within and between modules suggests that there are  
652 several patterns associated with feedforward and feedback connections, but that every pattern can be  
653 classified into one or the other type. Within most modules, feedforward has the characteristics described  
654 above (*i.e.*, densest in L2/3-L5), but between modules the feedforward connections were either dense in  
655 L2/3 and L6, or preferentially terminated in superficial layers (L1-L2/3). Feedback patterns matched  
656 previous descriptions in that there was preferential termination in L1 + deep layers (L5 or L6), or deep  
657 layers only. One of the most unusual patterns, not reported previously to the best of our knowledge, that  
658 clearly differentiated known feedforward from feedback connections was the strong presence of axons  
659 originating from L4 and ending in L2/3-L5. This occurred only in the feedforward direction of reciprocally  
660 connected pairs, but in the reverse direction there was both fewer axons from L4 and, when present, they  
661 were associated with more feedback patterns (avoiding L4). We also observed a striking relationship  
662 between feedforward/feedback patterns with the cell layer/classes, namely, supragranular (L2/3 and  
663 upper 4) neurons have predominantly feedforward projections, whereas infragranular (L5 and L6)  
664 neurons have both feedforward and feedback projections. However, as we have already noted, these  
665 types and their relationship to cell classes are also dependent on the specific connection.



666 Using these rules for feedforward and feedback across all cortical areas, we observe that the global  
667 organization of cortical connections is consistent with a hierarchy, in which a bottom-to-top direction can  
668 be defined. However, we want to emphasize that the hierarchical position does not explain all the  
669 connections, as the pathways between cortical areas are complex. The model used for **Figure 8e** shows  
670 an optimized hierarchy, but it is not the only possible solution, akin to the differences described for  
671 determining hierarchical order in primate visual cortex using the fraction of supragranular projection  
672 neurons (SLN), instead of discrete levels as in the Felleman and Van Essen diagram<sup>12,39</sup>.

673 Given the number of different connection types arising from a single area, we believe that new  
674 computational models, containing more than feedforward and feedback connections between nodes, are  
675 needed. This may be especially true when moving beyond models of sensory processing in the cortex.  
676 We would like to emphasize and encourage the adoption of a multigraph view of connectivity, in which  
677 two areas can be connected by multiple edges; each edge having an associated weight, type and  
678 subtype. We challenge the theoretical community to expand computational algorithms beyond those  
679 focused on classical graph structure. Additional data types that could predict directionality in cortical  
680 organization may also be added to these connections in the future. For example, the ratios of specific  
681 interneuron types, systematically mapped across all cortical areas, has recently been related to  
682 hierarchical position in the mouse<sup>58</sup>.

683 The expansion of the Allen Mouse Brain Connectivity Atlas to include mapping of projections from  
684 genetically-identified cell classes represents a big step toward a true *mesoscale* connectome. Here, we  
685 present the addition of ~ 1,000 new experiments to our online resource ([http://connectivity.brain-](http://connectivity.brain-map.org/)  
686 [map.org/](http://connectivity.brain-map.org/)), but focus only on the analysis of intracortical projection data. However, the complete brain-  
687 wide projection patterns are also already available for interested researchers to pursue a multitude of  
688 questions and analyses, and new results incorporating subcortical inputs and outputs may alter our view  
689 of a hierarchy in interesting and important ways. Finally, one of the limitations inherent in the population-  
690 based mapping approach used here is that we are still missing information at a more fine-grained level of  
691 cell types. Recent efforts and future work will undoubtedly further subdivide these broad classes of  
692 pyramidal neurons, at the level of areas as well as layers and projections, into specific cell types using  
693 morphology, physiology, and transcriptomics<sup>15,17</sup>. Here, we focused only on broad classes to derive  
694 general patterns of mesoscale cortical connectivity, which will be instructive and informative for future  
695 connectome data from more refined cell types. However, future large-scale efforts aimed at mapping the  
696 projections of specific cell types rather than classes, and even single cells<sup>59,60</sup> will no doubt reveal  
697 additional principles of cell type-specific connectivity across the brain, moving us even closer to a full  
698 mesoscale connectome.

699

700 Figures

701

702

Figure 1

| a             |         | Mouse Line |               |               |                |           |                |                |                |               |             |                 | Layer           | Projection Class | TOTAL           |                |     |  |
|---------------|---------|------------|---------------|---------------|----------------|-----------|----------------|----------------|----------------|---------------|-------------|-----------------|-----------------|------------------|-----------------|----------------|-----|--|
|               |         | C57BL/6J   | Emx1-IRES-Cre | Cux2-IRES-Cre | Sepw1-Cre_NP39 | Nr5a1-Cre | Scnn1a-Tg3-Cre | Rorb-IRES2-Cre | Rbp4-Cre_KL100 | Tlx3-Cre_PL56 | A93-Tg1-Cre | Chrna2-Cre_OE25 | Efr3a-Cre_NO108 | Sim1-Cre_KJ18    | Ntsr1-Cre_GN220 | Sy16-Cre_KI148 |     |  |
|               |         | L2-5       | L2-6          | L2/3          | L2/3           | L4        | L4/5           | L4/5           | L5             | L5            | L5          | L5              | L5              | L5               | L6              | L6             |     |  |
|               |         | IT         | PT            | CT            | IT             | PT        | CT             | IT             | PT             | CT            | IT          | PT              | CT              | IT               | PT              | CT             |     |  |
| prefrontal    | FRP     | 1          |               | 1             |                |           |                |                |                |               |             |                 |                 |                  | 1               |                | 3   |  |
|               | MOs     | 9          |               | 9             | 3              | 2         |                | 2              | 9              | 9             | 5           | 4               | 5               | 12               | 6               | 8              | 83  |  |
|               | ACAd    | 3          | 5             | 2             |                |           | 2              |                | 3              | 2             | 3           | 2               | 2               | 2                | 3               | 3              | 30  |  |
|               | ACAV    | 2          |               | 4             | 1              |           |                |                | 3              | 2             | 2           | 2               | 2               |                  | 2               | 3              | 23  |  |
|               | PL      | 1          | 1             | 3             |                |           |                |                | 1              | 1             | 1           |                 |                 |                  | 1               |                | 9   |  |
|               | ILA     | 1          |               | 1             |                |           |                |                | 1              |               | 1           | 2               |                 |                  | 1               | 1              | 8   |  |
|               | ORBI    | 4          |               | 1             | 1              | 1         |                |                | 1              | 1             | 1           | 1               | 1               |                  | 1               | 1              | 12  |  |
|               | ORBm    | 1          | 1             | 2             |                |           |                |                | 1              |               |             |                 |                 |                  |                 | 2              | 7   |  |
|               | ORBvl   | 2          |               | 1             |                |           |                |                | 3              | 1             |             | 1               |                 |                  |                 |                | 8   |  |
| anterolateral | GU      |            |               |               |                |           |                | 1              |                | 1             |             |                 |                 |                  |                 |                | 2   |  |
|               | VISC    | 4          |               |               |                |           |                |                |                |               |             |                 | 1               |                  |                 |                | 5   |  |
|               | Ald     | 2          |               | 3             |                |           |                | 1              | 1              |               | 1           |                 |                 |                  | 1               | 1              | 10  |  |
|               | Alp     |            |               | 1             |                |           |                | 1              |                | 1             | 1           |                 |                 |                  |                 |                | 4   |  |
|               | Alv     |            |               |               |                |           |                | 1              |                |               |             |                 |                 |                  |                 |                | 1   |  |
| somatomotor   | MOp     | 8          |               | 1             | 1              | 1         | 1              | 1              | 1              | 1             | 2           | 2               | 1               | 3                | 2               | 3              | 26  |  |
|               | SSp-n   | 3          |               |               | 1              | 1         | 1              | 1              | 2              |               | 1           | 1               | 1               | 1                |                 | 2              | 15  |  |
|               | SSp-bfd | 6          | 1             | 4             | 1              | 2         | 3              | 1              | 3              | 2             | 2           | 1               | 2               | 2                | 8               | 2              | 40  |  |
|               | SSp-ll  | 3          |               | 3             |                | 1         |                | 2              | 3              | 3             | 2           |                 | 1               | 1                | 2               | 1              | 22  |  |
|               | SSp-m   | 5          |               | 2             | 2              | 4         | 1              | 2              | 1              | 1             | 1           | 1               | 2               | 3                | 2               | 26             |     |  |
|               | SSp-ul  | 2          |               | 2             |                |           |                | 2              | 2              | 1             | 1           | 1               | 1               | 2                |                 |                | 14  |  |
|               | SSp-tr  | 2          |               |               |                |           |                |                | 1              | 1             | 1           | 1               | 1               | 1                | 1               |                | 8   |  |
|               | SSp-un  |            |               |               |                |           |                |                |                |               |             |                 |                 |                  | 1               |                | 1   |  |
|               | SSs     | 3          |               | 3             |                | 1         | 1              | 1              | 4              | 2             | 2           | 2               | 1               | 1                | 2               | 2              | 25  |  |
| visual        | VISal   | 1          | 1             | 2             |                |           | 2              | 3              | 3              | 3             |             |                 |                 |                  | 2               |                | 17  |  |
|               | VISI    | 4          | 6             | 7             |                | 1         |                | 2              | 5              | 4             |             |                 | 3               | 4                | 1               |                | 39  |  |
|               | VISp    | 31         | 26            | 23            | 2              | 7         | 10             | 4              | 17             | 20            | 24          | 5               | 3               | 2                | 16              | 4              | 194 |  |
|               | VISpl   | 1          |               |               |                |           |                |                | 2              | 2             |             |                 |                 |                  | 1               | 2              | 8   |  |
|               | VISli   | 2          |               | 1             |                | 1         |                |                | 2              | 1             | 2           |                 |                 |                  | 1               | 1              | 11  |  |
|               | VISpor  | 2          | 1             | 5             |                | 1         |                | 4              | 2              | 2             |             |                 |                 | 4                | 3               | 24             |     |  |
|               | VISrl   |            | 2             | 3             |                | 2         | 1              |                | 3              | 3             | 2           |                 | 1               |                  | 1               |                | 18  |  |
| medial        | VISa    |            |               |               | 1              |           |                | 1              | 1              | 3             |             | 1               |                 | 2                |                 |                | 9   |  |
|               | VISam   | 3          | 2             | 5             |                |           | 1              | 2              | 6              | 1             |             | 1               | 1               | 3                | 1               |                | 26  |  |
|               | VISpm   | 1          | 4             | 2             |                |           | 3              | 2              | 3              | 3             | 1           | 1               |                 | 2                | 1               |                | 23  |  |
|               | RSPagl  | 1          | 2             | 3             |                |           |                | 3              | 2              | 2             |             |                 |                 | 5                | 1               |                | 19  |  |
|               | RSPd    | 2          | 2             | 1             |                |           | 1              | 2              | 2              | 1             |             |                 | 1               | 4                |                 |                | 16  |  |
| temporal      | RSPv    | 3          | 3             | 4             | 1              |           | 2              | 3              |                | 5             | 3           | 1               |                 |                  | 3               |                | 28  |  |
|               | AUDd    | 2          |               | 1             | 1              | 1         |                |                | 1              |               |             |                 |                 |                  |                 |                | 6   |  |
|               | AUDp    | 4          | 2             | 2             |                |           | 1              | 1              | 1              | 1             |             |                 |                 | 1                | 2               | 1              | 16  |  |
|               | AUDpo   | 1          | 3             | 3             |                |           |                |                | 1              |               | 1           |                 |                 |                  | 1               |                | 10  |  |
|               | AUDv    | 1          |               |               |                |           |                |                |                |               |             |                 |                 |                  |                 |                | 1   |  |
|               | TEa     |            |               |               |                |           |                |                |                |               |             | 1               |                 |                  | 1               |                | 2   |  |
|               | PERI    |            |               |               |                |           |                |                |                |               |             |                 |                 |                  |                 |                | 0   |  |
| ECT           | 1       |            |               |               |                |           |                |                |                |               |             |                 |                 |                  |                 | 1              |     |  |
| Sources       |         | 35         | 16            | 31            | 9              | 13        | 17             | 10             | 33             | 26            | 29          | 19              | 18              | 14               | 27              | 25             |     |  |
| Expts         |         | 122        | 62            | 105           | 12             | 23        | 38             | 17             | 90             | 78            | 77          | 34              | 29              | 31               | 81              | 51             | 850 |  |

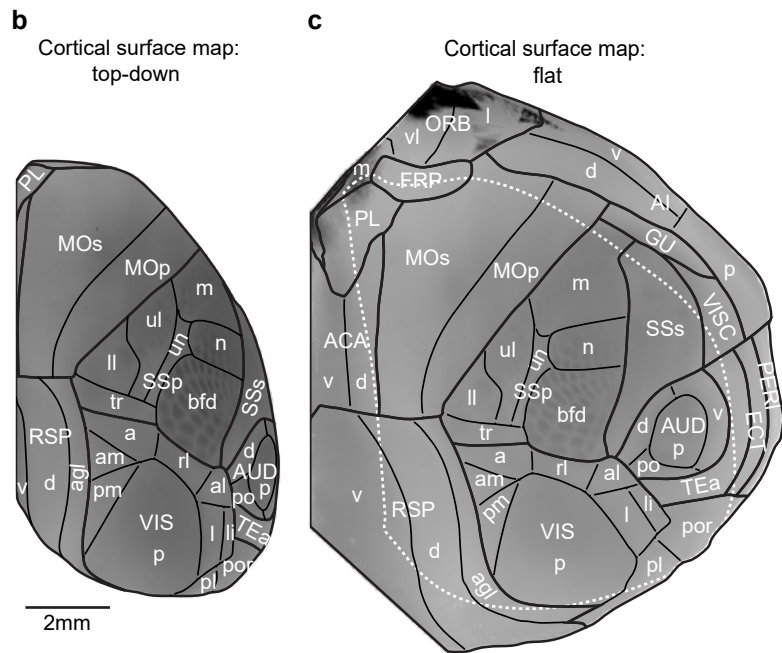**d** Centroid locations of all experiments (n=1,082)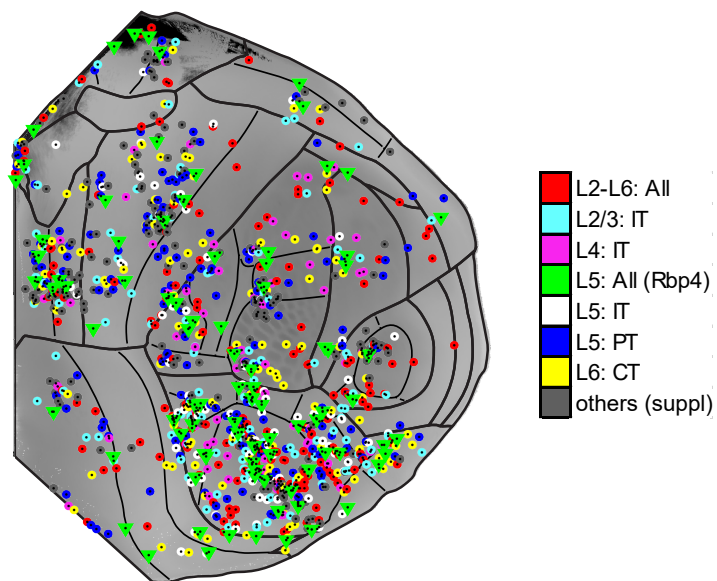

703 **Figure 1. Systematic generation of cortical projection mapping data by area and mouse line. (a)**  
704 Location and number of 850 tracer injection experiments across cortical areas and selected mouse lines.  
705 These 15 lines (C57BL/6J through Syt6-Cre\_K1148) were used most extensively across cortical regions  
706 to map projections using Cre driver lines with expression preferentially in the layers and projection neuron  
707 classes indicated **(b)** Mouse isocortex is parcellated into 43 areas in the Allen CCF. The positions of most  
708 areas are visible in our standard top-down view of the right hemisphere cortical surface. This view is  
709 obtained by projecting the maximum density voxels from the average template brain, used to construct  
710 the CCF, along a curved coordinate system meant to match the columnar structure of the cortex (as  
711 opposed to a direct z-projection). **(c)** Areas that occupy very lateral, frontal and midline positions are  
712 better viewed in a flattened map of the mouse cortex. The flatmap is generated by constructing a 3D-to-  
713 2D mapping such that the 2D Euclidean distance of every point on the flatmap to a pair of anchor points  
714 are the same as their 3D geodesic distance (shortest path along surface), resulting in the coordinate  
715 along one axis formed by the anchor points. This process is repeated for a second pair of anchor points  
716 to form the second axis. The white dotted line indicates the boundaries of what is visible in the top-down  
717 view in **b**. **(d)** The positions of all 1,082 injection centroids are plotted on the flat cortical surface. The 850  
718 experiments are color coded as indicated by layer-specific projection class. The remaining 232 are shown  
719 in dark gray.

720



Figure 2

bioRxiv preprint doi: <https://doi.org/10.1101/292961>; this version posted April 18, 2018. The copyright holder for this preprint (which was not certified by peer review) is the author/funder. All rights reserved. No reuse allowed without permission.

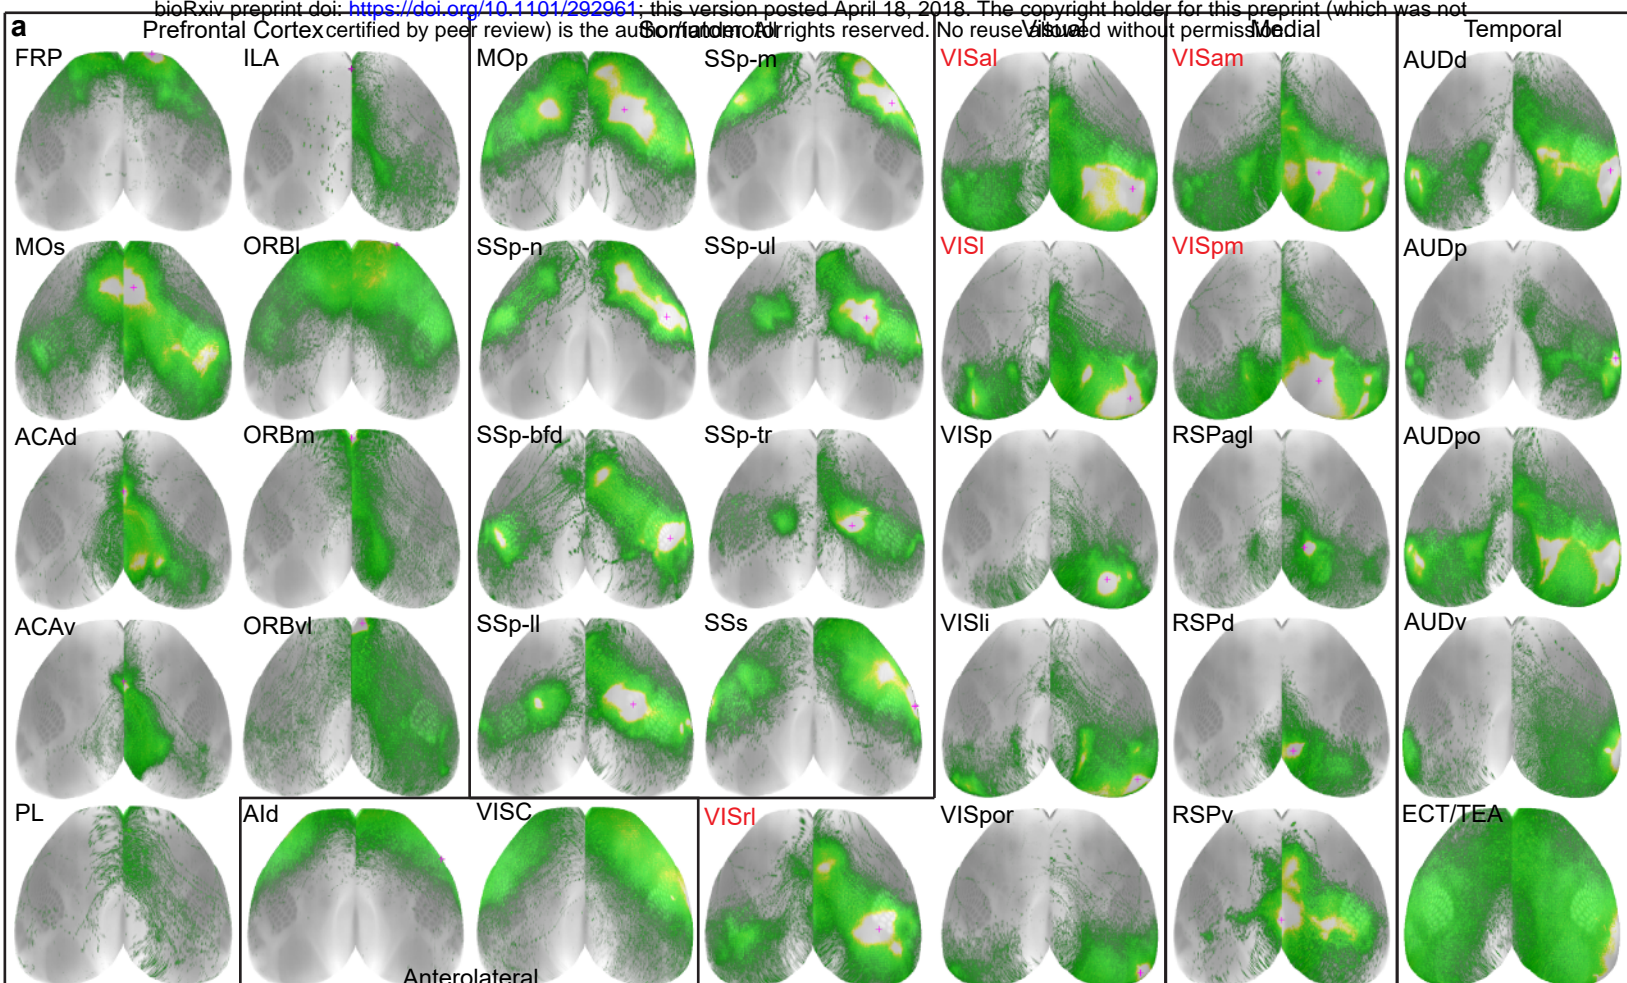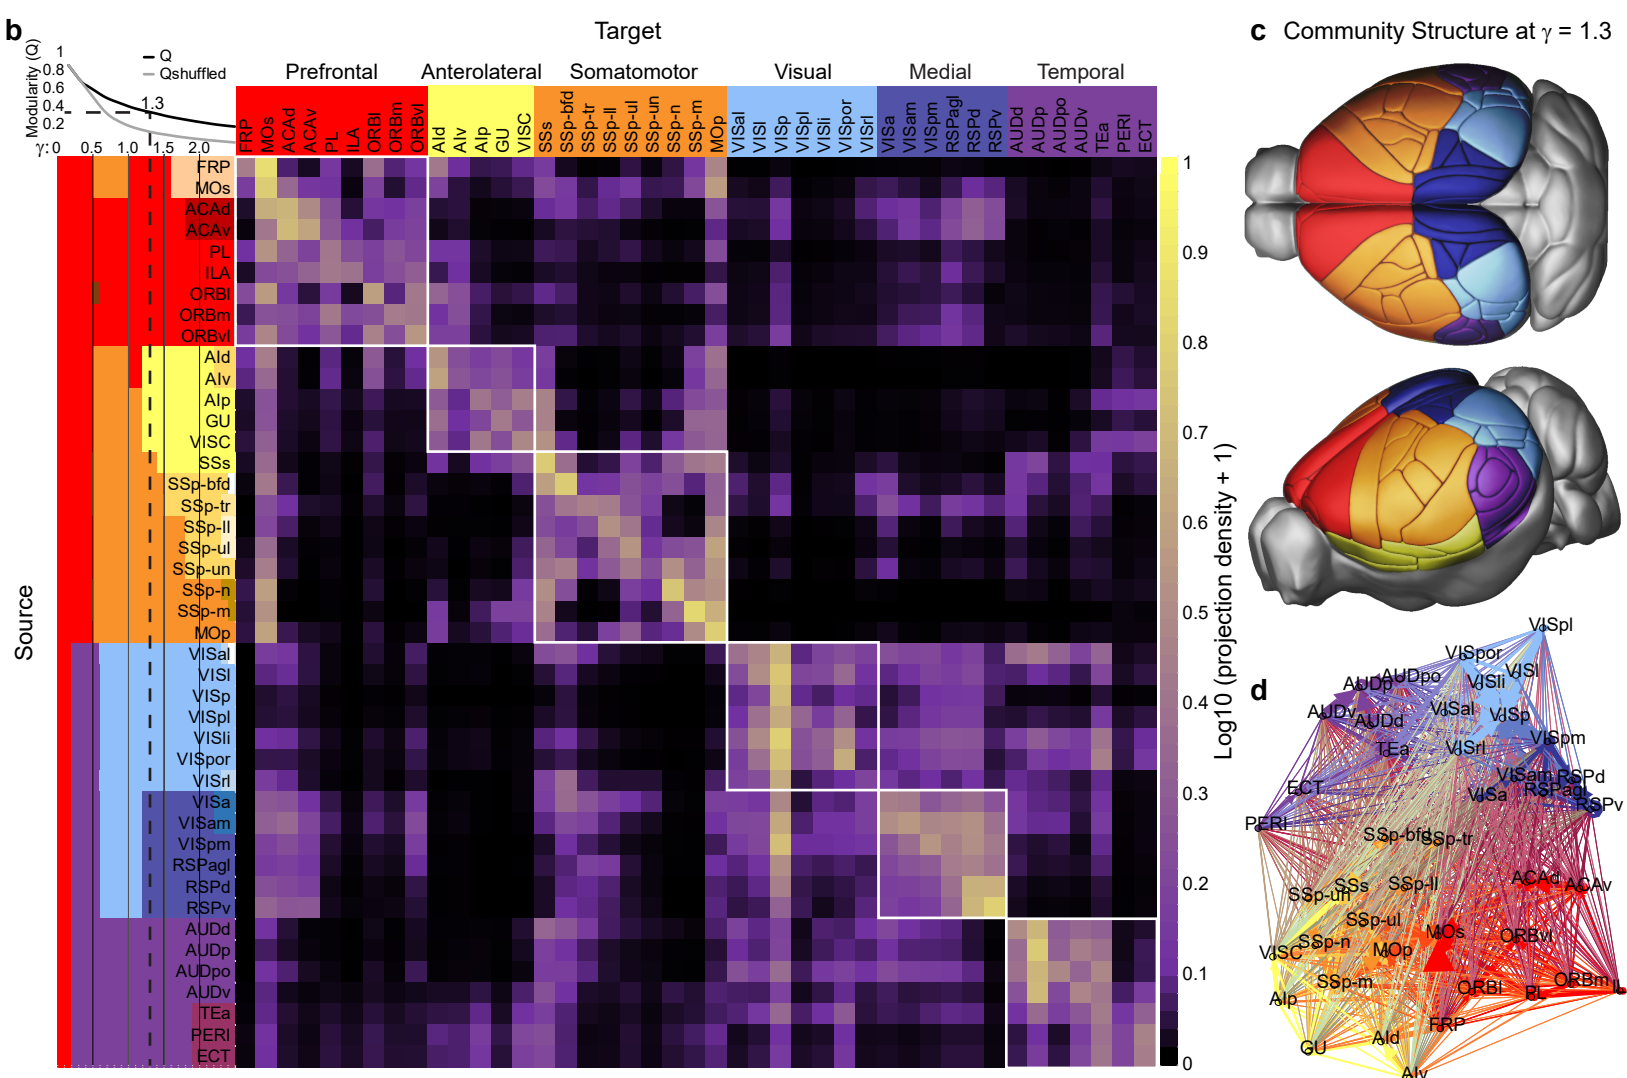



721 **Figure 2. Modular organization of intracortical projection patterns based on the wild type**  
722 **connectivity matrix. (a)** Top down cortical surface views showing the relative projection densities of  
723 labeled axons (normalized within each experiment, white is saturation) originating from 35 cortical source  
724 areas in C57BL/6J (black labels) or Emx1-IRES-Cre (red labels) mice. Red cross hairs indicate the  
725 location of the injection centroid. Some are not visible in the top down view. **(b)** Weighted connectivity  
726 matrix for 43 cortical areas. The data matrix was derived from the voxel-based model of Knox et al., 2018  
727 and shows the connection strength as log<sub>10</sub>-transformed normalized projection density (the sum of  
728 predicted density per voxel in a target region normalized to that target's volume). Rows are sources,  
729 columns are targets. Cortical areas are ordered first by module membership then by ontology order in the  
730 Allen CCF. Colors along the matrix axes indicate community structure with varying levels of resolution ( $\gamma =$   
731 0-2.5 on the y axis,  $\gamma = 1.3$  only on the x-axis). The modularity metric (Q) is plotted for each level of  $\gamma$ ,  
732 along with the Q value for a shuffled network containing the same weights. Community structure was  
733 determined independently for each value of  $\gamma$ , but colors were matched to show how communities split as  
734 the resolution parameter is increased. **(c)** Cortical regions color-coded by their community affiliation at  $\gamma =$   
735 1.3 show spatial relationships. **(d)** Diagram shows the ipsilateral cortical network in 2D using a force-  
736 directed layout algorithm. Nodes are color coded by module. Edge thickness shows relative projection  
737 density and edges between modules are colored as a blend of the module colors.

738

Figure 3.

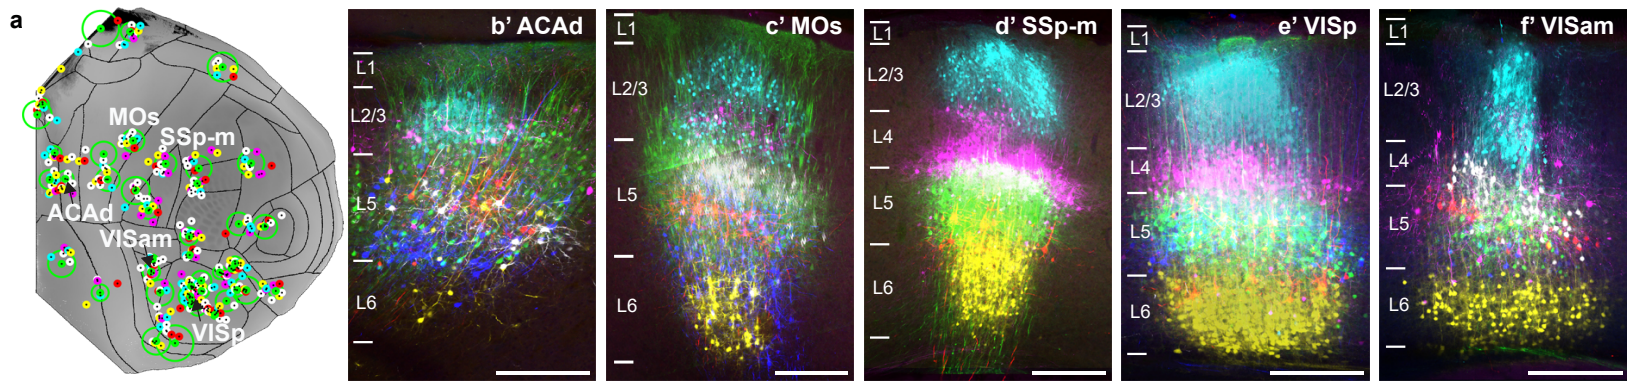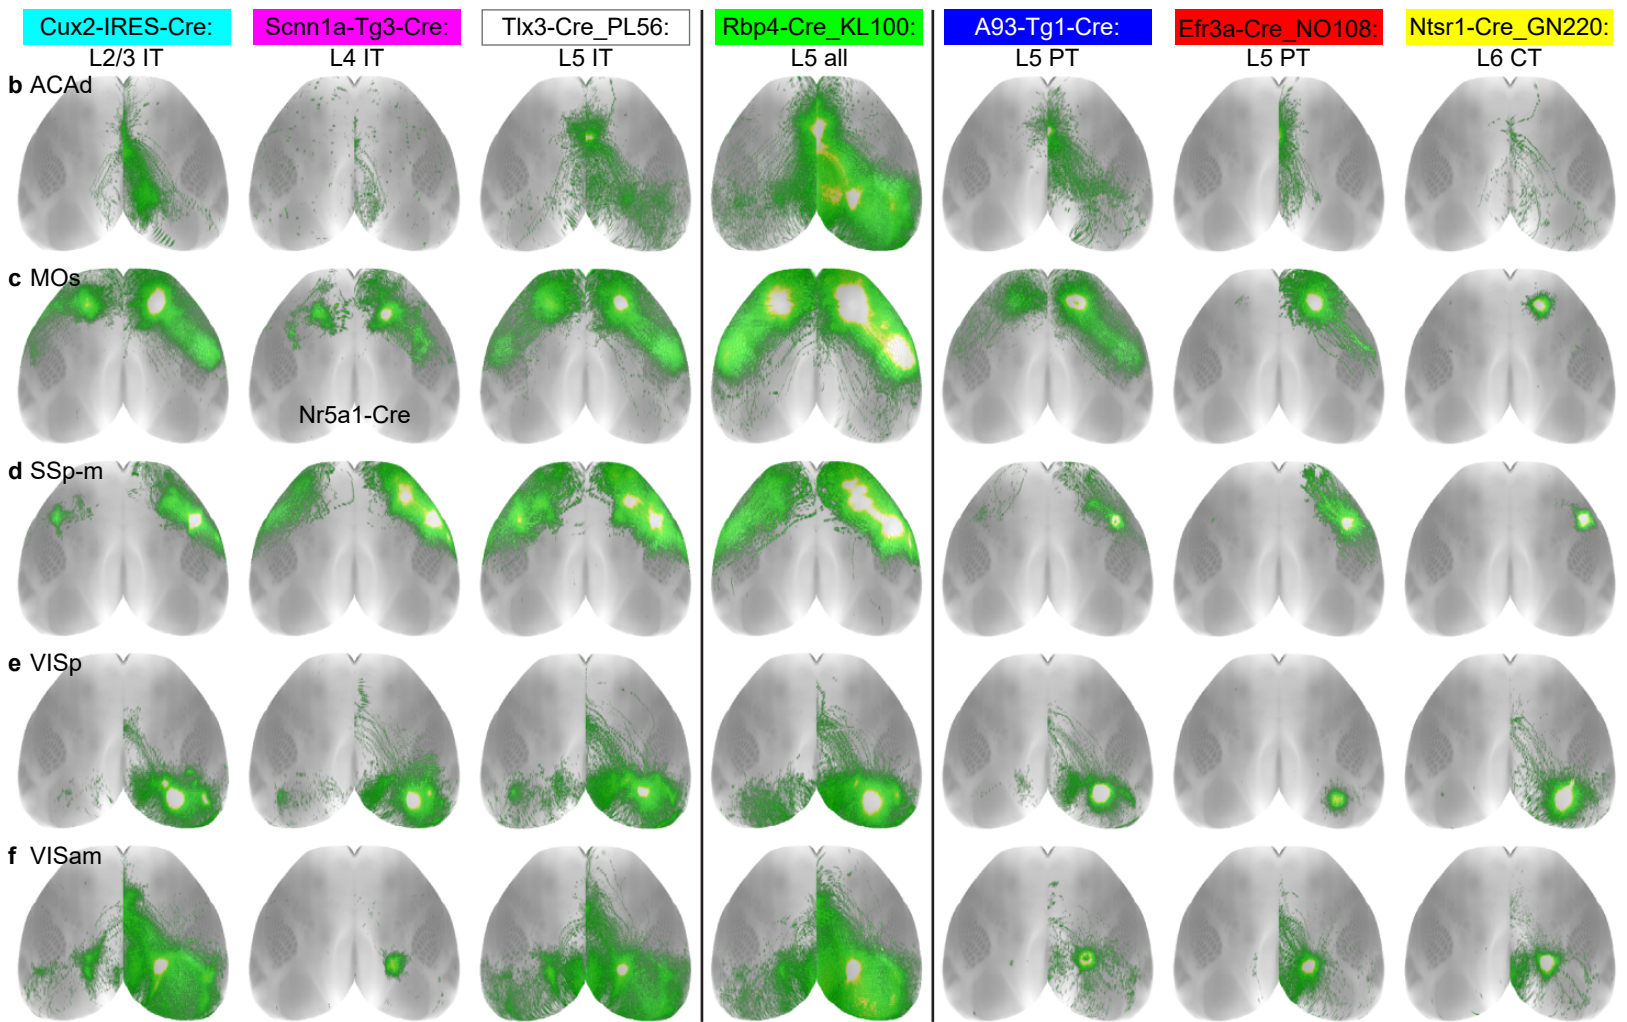

739 **Figure 3. Comparison of layer- and class-selective intracortical projection patterns. (a)** 43 groups of  
740 spatially-matched experiments to an Rbp4-Cre\_KL100 anchor were collated based on having a  
741 “complete” membership roster; representing L2/3 IT, L4 IT, L5 IT, L5 PT, L6 CT and the L5 IT PT CT data  
742 from Rbp4-Cre\_KL100. Each Rbp4-Cre experiment is shown as a green dot; all other experiments are  
743 color coded by layer and class as indicated. The green circle indicates the variance in distance to Rbp4  
744 for each group. The five labeled groups are the examples shown in **b-f** (ACAd, MOs, SSp-m, VISp, and  
745 VISam). **(b'-f')** 2-photon images acquired at the center of each injection site were manually overlaid by  
746 finding the best match between the top of L1 (pial surface) and bottom of L6 (white matter boundary)  
747 between each experiment, and then pseudocolored by Cre line to highlight the layer selectivity of Cre  
748 expression. Scale bar = 250  $\mu$ m. **(b-f)** Top down views of the labeled axonal projections across the cortex  
749 originating from the infected neurons shown in **b'-f'**. Three Cre lines that label IT projection classes in  
750 L2/3 (Cux2-IRES-Cre), L4 (Scnn1a-Tg3-Cre, or Nr5a1-Cre as indicated for MOs) and L5 (Tlx3-Cre\_PL56)  
751 are shown to the left of Rbp4-Cre\_KL100. Three lines that predominantly label PT or CT projection  
752 neurons in L5 (A93-Tg1-Cre, Efr3a-Cre\_NO108) and L6 (Ntsr1-Cre\_GN220) are shown to the right.  
753 These lines also have intracortical projections, but target a smaller number of areas.

754

Figure 4

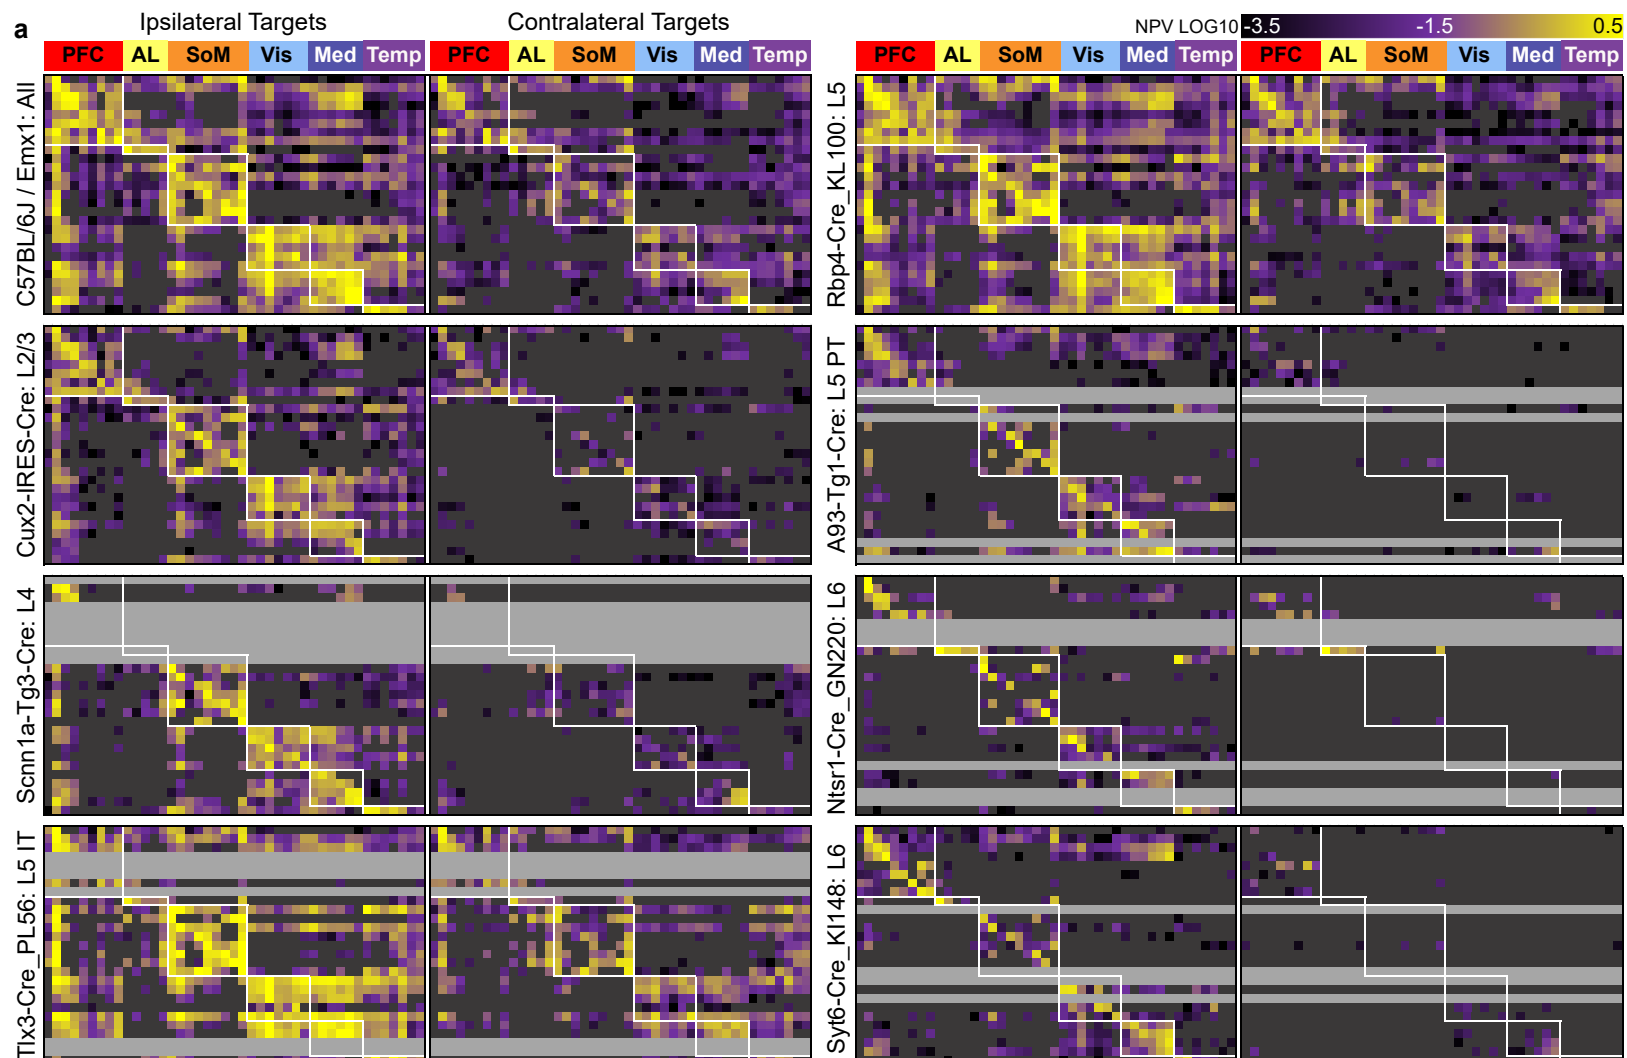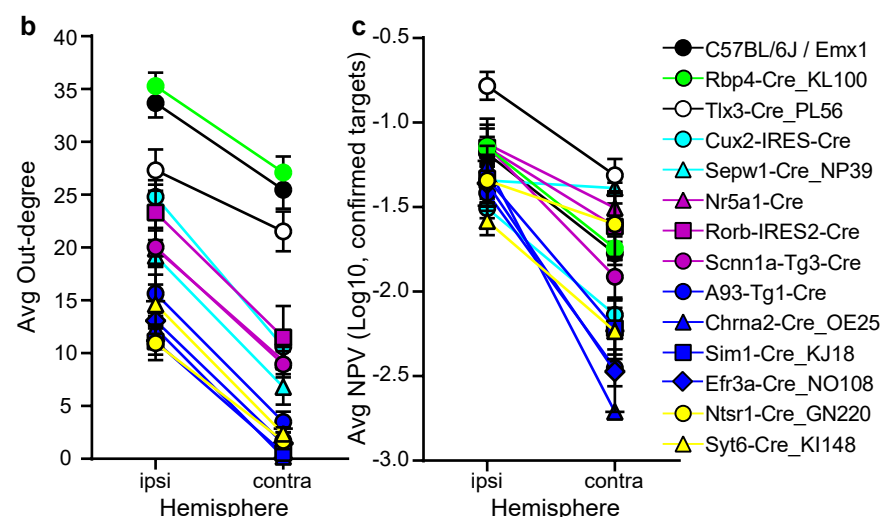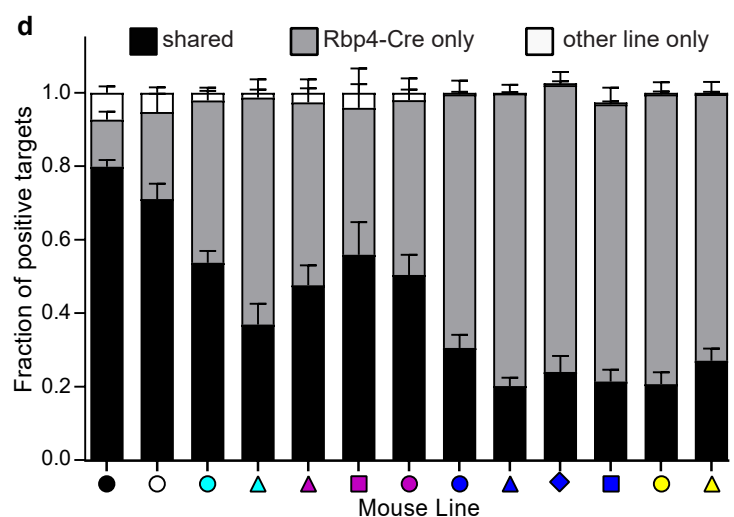

755 **Figure 4. Cre line and layer-specific cortical outputs. (a)** Eight directed, weighted, connectivity  
756 matrices (27 x 86) are shown for mouse lines representing projections labeled from different layers and  
757 cell classes. Each row of one matrix contains experimental data from one of 27 unique source areas.  
758 Columns show the 43 ipsilateral and 43 contralateral cortical target regions. Rows and columns follow the  
759 same module-based ordering in each matrix. Areas and connections belonging to the modules assigned  
760 using the ipsilateral voxel-based model data in Figure 2b are indicated by the white boxes. For every  
761 experiment, each of the 43 ipsilateral and 43 contralateral targets were inspected and assigned as  
762 containing either true positive or true negative axon terminal labeling. All true negatives (including passing  
763 fibers) were masked and colored dark grey. Rows for which an experiment was not completed are light  
764 grey. This was often because of low levels of Cre expression in those areas. The color map corresponds  
765 to log<sub>10</sub>-transformed normalized projection volumes in each target (range 10<sup>-3.5</sup> to 10<sup>0.5</sup>, truncated at both  
766 ends). **(b)** The average out-degree across all sources represented in each matrix for each Cre line is  
767 plotted for the ipsilateral and contralateral cortex. **(c)** The average strength of all the connections (log<sub>10</sub>-  
768 transformed normalized projection volume) across source areas in each matrix are plotted for ipsilateral  
769 and contralateral hemisphere by Cre line. **(d)** Binary present or absent calls for the targets of each  
770 experiment were compared to the presence/absence calls from the matched Rbp4-Cre\_KL100 anchor  
771 experiment. The average fraction of true positive targets shared by each line with its Rbp4 anchor  
772 experiment is plotted in the bar graph (black) as well as the average fraction of positive targets that are  
773 unique to Rbp4 (gray) or unique to the line indicated (white). Symbols or bars in **b-d** show mean +/- SEM.  
774



Figure 5

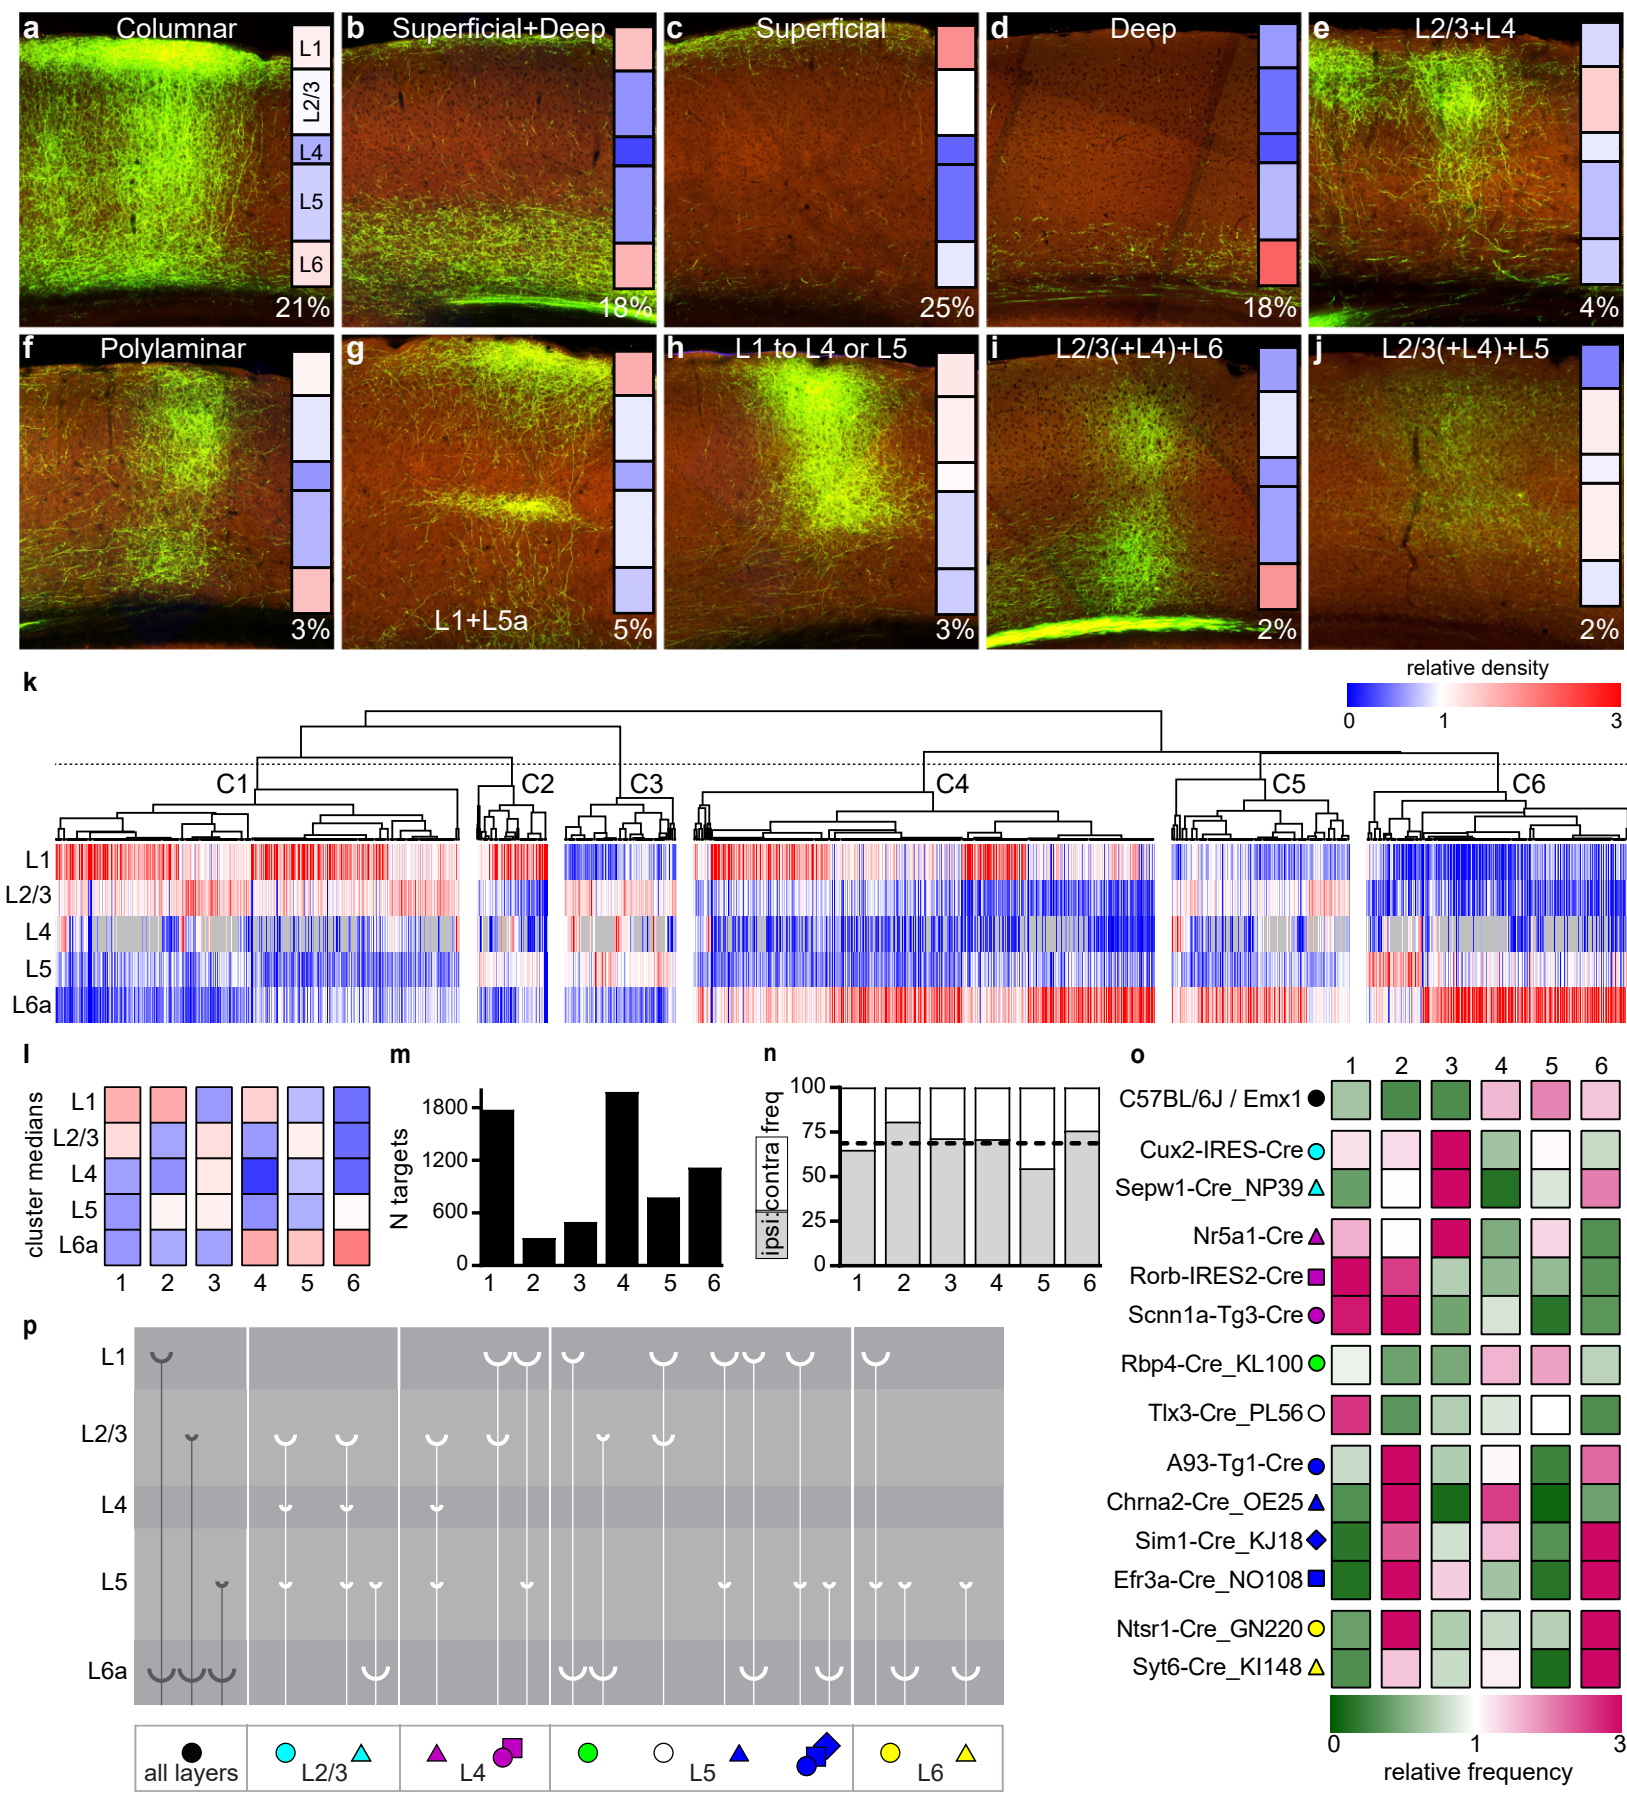

775 **Figure 5: Diverse target lamination patterns in mouse cortex. (a-j)** Relative densities of axon terminal  
776 labeling across layers for every cortical target were visually inspected for a subset of experiments, and  
777 then classified into one of ten categories based on overall observations. Four patterns occurred most  
778 frequently; **(a)** columnar, with relatively equal densities across all layers (21%), **(b)** superficial and deep  
779 layers in equal densities (18%), **(c)** superficial layers only (25%), or **(d)** deep layers only (18%). Additional  
780 patterns of note, although rare (<10%), included those in which L1 received relatively few axons **(e, i, j)**.  
781 Insets show the results of averaging informatively-derived quantification of relative layer density (the  
782 fraction of the total projection signal in each layer, scaled by the relative layer volumes) for all targets  
783 manually classified to that category. A relative density value of “1” (color = white) indicates that the  
784 fraction of axon labeling within a specific layer is equal to the relative size of that layer in that target, *i.e.*, it  
785 is neither more nor less dense than expected if axons were distributed evenly across layers, given  
786 differences in layer volumes. Values <1 indicate lower than expected density and >1 higher than  
787 expected density. Relative densities were color coded from 0 (blue) to 1 (white) to 3 (red). The color map  
788 key applies for panels a-l. **(k)** Unsupervised hierarchical clustering using spearman correlation and  
789 average linkages on the relative density values per layer. Each column is a unique combination of cre  
790 line, source area and target, after thresholding as described in the results. The dotted line indicates where  
791 the dendrogram was cut into 6 clusters. **(l)** Median relative density values by layer for each of 6 clusters.  
792 **(m)** Total number of targets in each cluster. **(n)** The frequency of ipsilateral and contralateral targets  
793 assigned to each cluster. The dotted line indicates the overall frequency of ipsilateral targets (68.77%).  
794 **(o)** The relative frequency of each Cre line appearing in one of the 6 clusters. The fraction of experiments  
795 in a cluster belonging to each Cre line was divided by the overall frequency of experiments from that Cre  
796 line in the complete dataset. A relative frequency value of “1” (color = white) indicates that Cre line  
797 appeared in that cluster with the same frequency as in the entire dataset. Values <1 (green) indicate  
798 lower than expected frequency, and >1 (pink) indicate higher than expected frequency of that Cre line in a  
799 cluster. **(p)** Schematic diagram showing the relationships between the layer and class of origin in the  
800 source area (Cre line symbols at the bottom) with the most frequent axon lamination patterns observed in  
801 the target area.

802



Figure 6

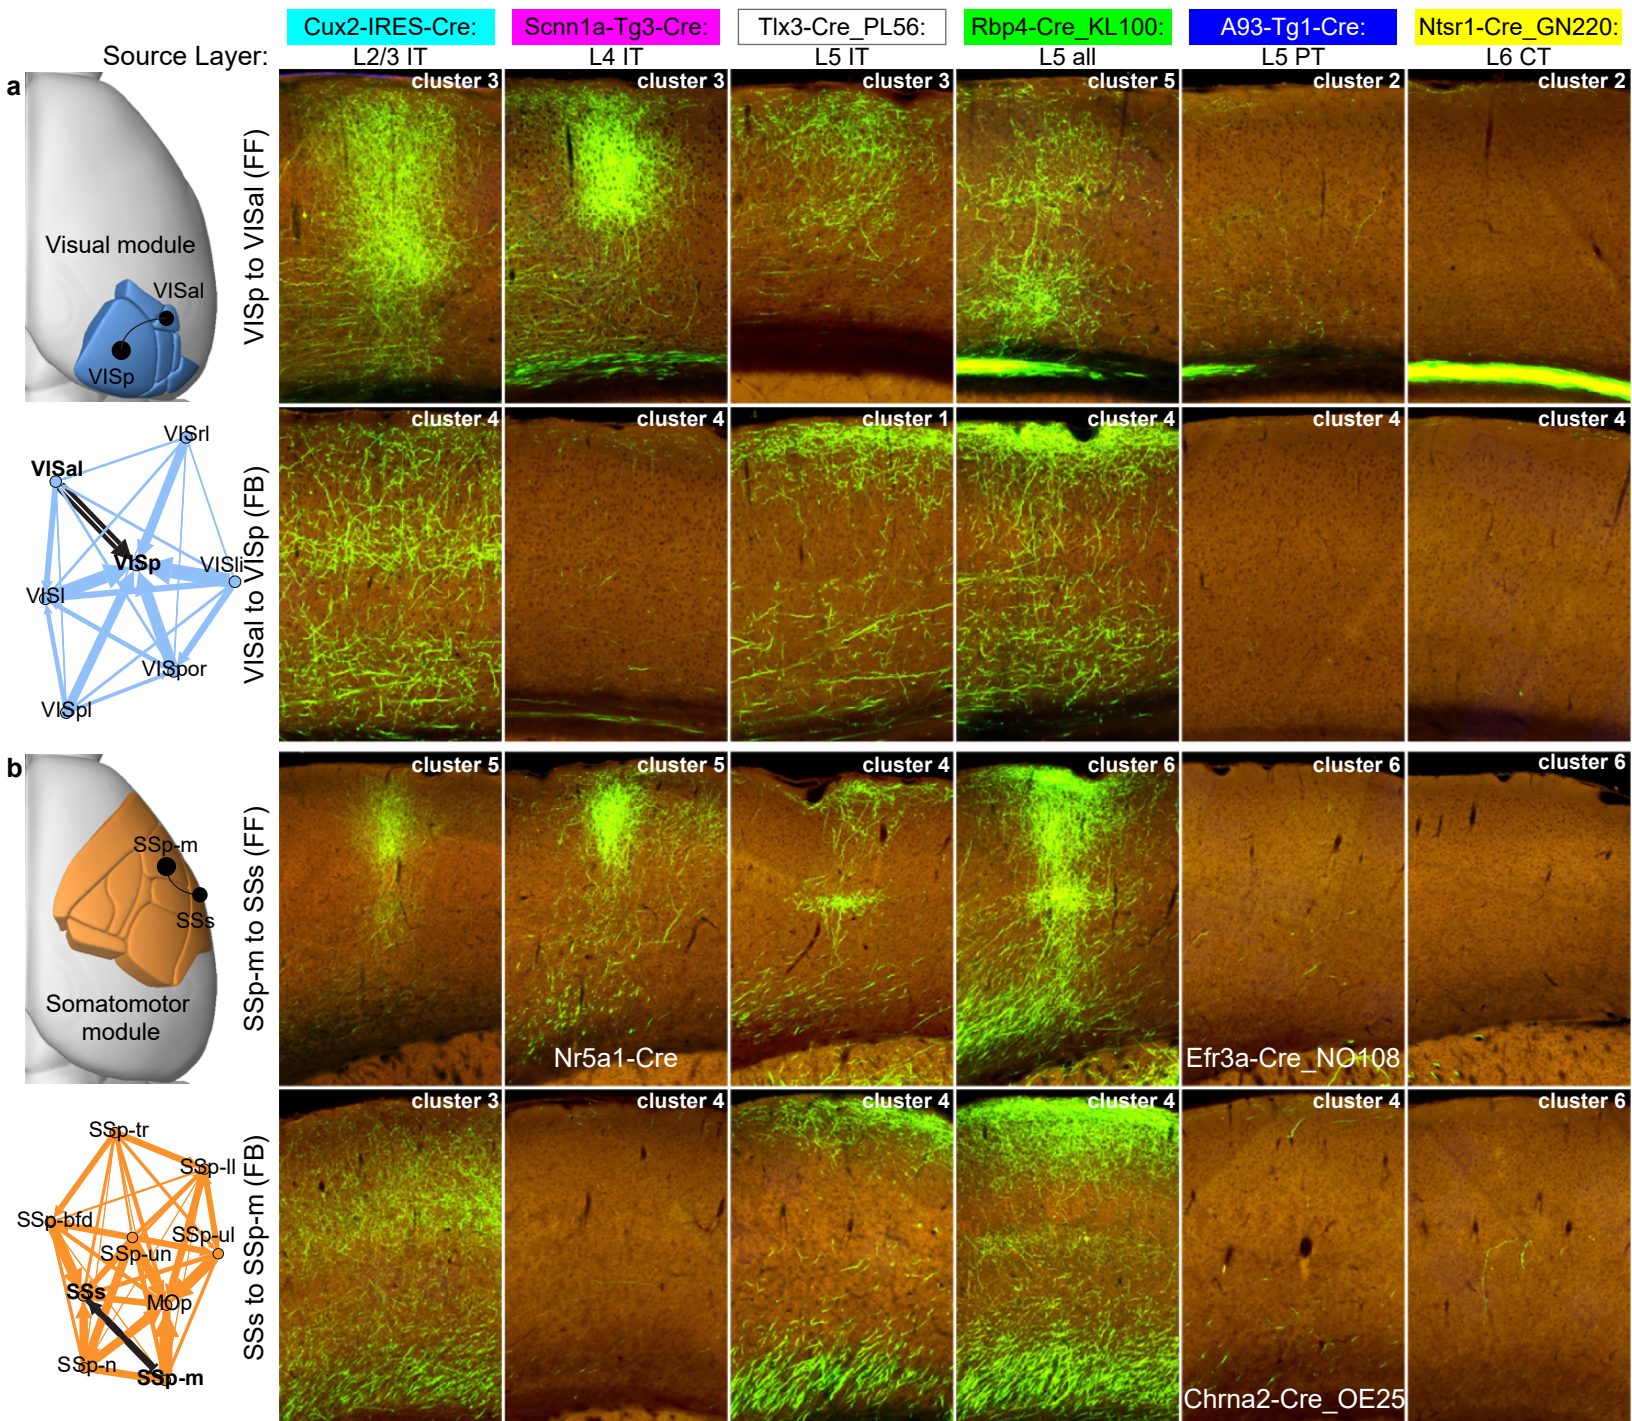

803 **Figure 6. Intra-module projection patterns between reciprocally connected areas originating from**  
804 **different layers/classes. (a)** In the visual module, VISp and VISal are reciprocally connected (black and  
805 white arrows). VISp is the de facto bottom of visual cortex hierarchies. The output to VISal from VISp is  
806 feedforward (FF). The reciprocal connection (VISal to VISp) is feedback (FB). **(b)** In the somatomotor  
807 module, the primary somatosensory cortex (SSp), like VISp, is the de facto bottom of the hierarchy. SSp-  
808 m sends feedforward projections to the secondary somatosensory region (SSs). SSs sends feedback  
809 projections to SSp-m. Modules from Figure 2b are shown spatially mapped on the cortex and as a force-  
810 directed network layout with the thickness of the lines corresponding to relative connection weights. 2P  
811 images in the approximate center of the axon termination fields for each target region show the laminar  
812 distribution of axons arising from labeled neurons in the different Cre lines, as indicated. Images were  
813 rotated so that the pial surface is always at the top of each panel. The cluster assignment for that line-  
814 source-target combination (columns **in Figure 5k**) is also indicated in each panel. One very striking  
815 difference between FF and FB connections was the strength and pattern of projections originating from  
816 L4 IT cells (second column). L4 IT cells in both modules strongly projected to the target in the FF  
817 direction, with patterns showing sparser axons in L1. In the FB direction, the L4 projection was weaker  
818 and ended in L1.

819





820 **Figure 7. Inter-module projection patterns between reciprocally connected areas originating from**  
821 **different layers/classes. (a)** Many reciprocal connections exist between areas in prefrontal and visual  
822 modules, e.g. VISp and ACAd. ACAd exerts top-down control of VISp activity, so we assume this  
823 connection is FB, and that the reverse is FF. **(b)** Reciprocal connections also exist between nodes of the  
824 prefrontal and somatomotor modules, e.g. MOs and MOp. Modules from Figure 2b are shown spatially  
825 mapped on the cortex and as a force-directed network layout with the thickness of the lines  
826 corresponding to relative connection weights. Like in Figure 6, 2P images in the approximate center of the  
827 axon termination fields for each target region show the laminar distribution of axons arising from labeled  
828 neurons in the different Cre lines, as indicated. Images were rotated so that the pial surface is always at  
829 the top of each panel. The cluster assignment for that line-source-target combination (columns in **Figure**  
830 **5k**) is also indicated in each panel.

831

Figure 8

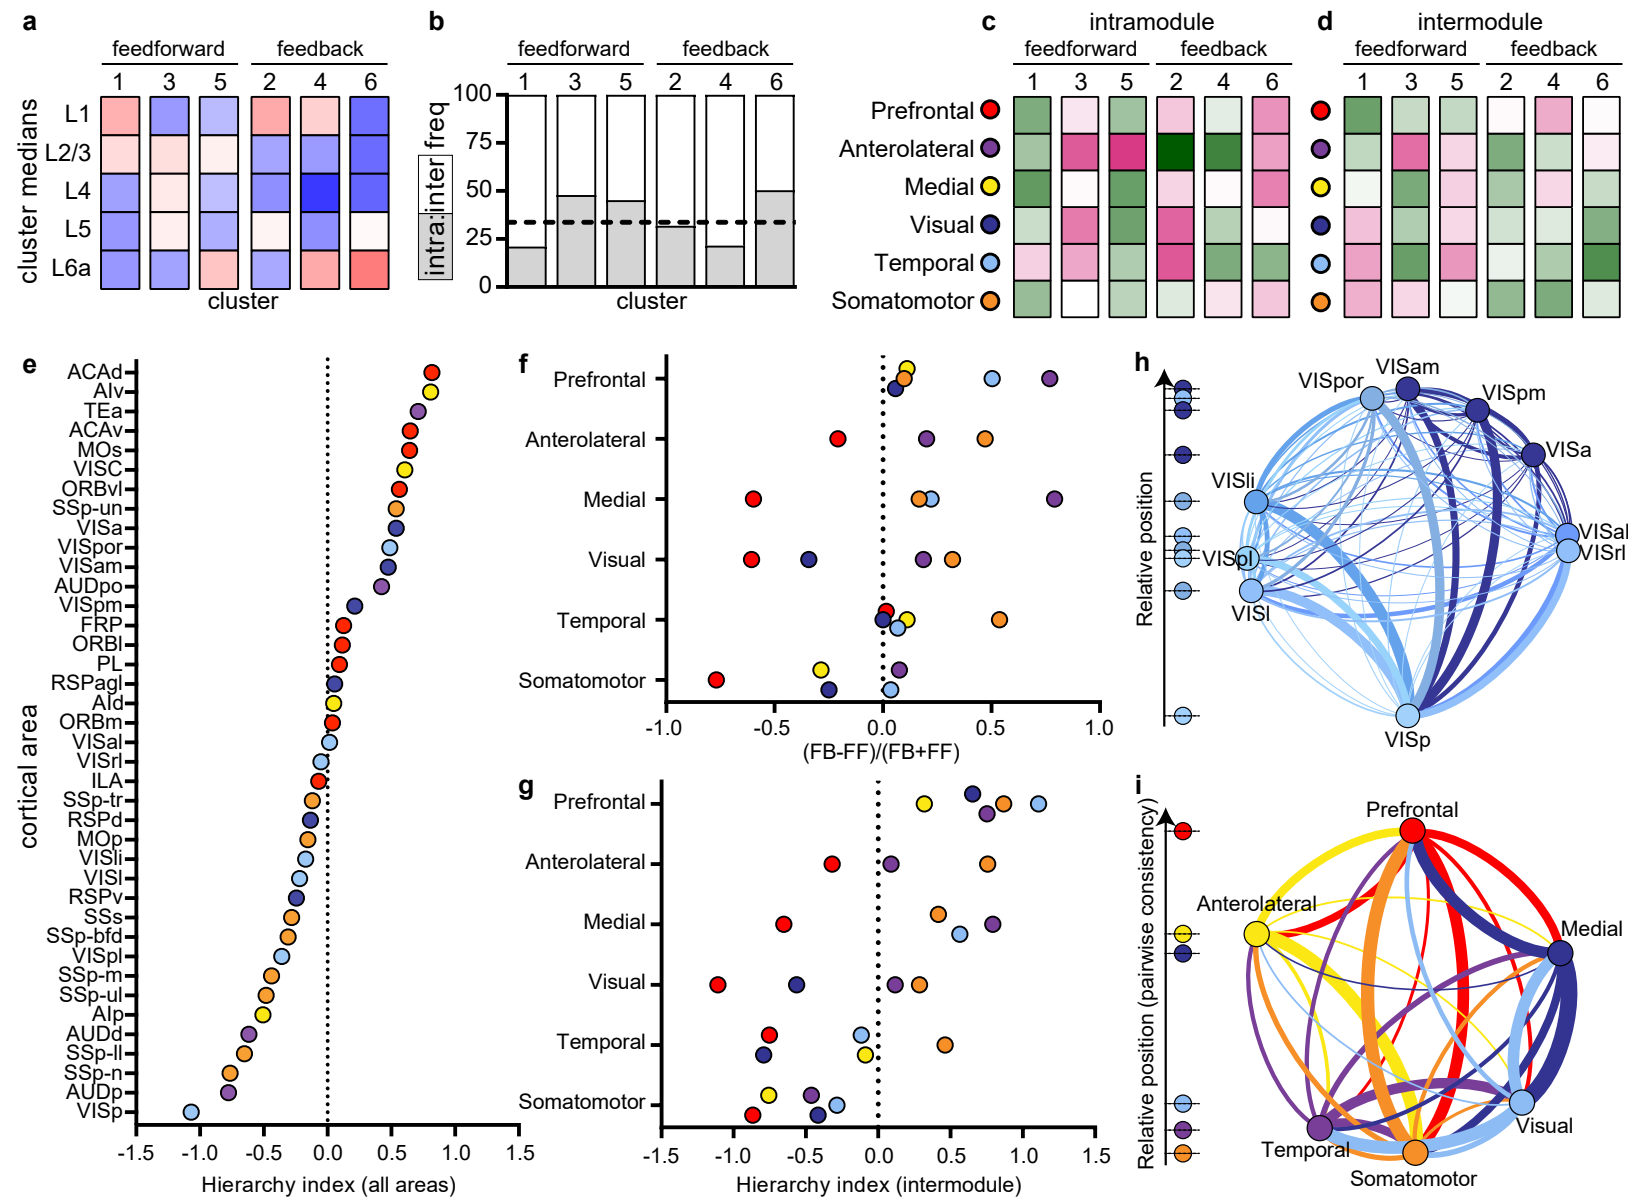



832 **Figure 8. Organization of network modules into a hierarchy based on anatomical patterns of**  
833 **connections. (a)** The six layer patterns identified through clustering in **Figure 5k** were classified as either  
834 feedforward or feedback. Clusters 1,3, and 5 were considered as characteristic of different feedforward  
835 projections. Clusters 2,4, and 6 were considered characteristic of different feedback projections. **(b)** The  
836 relative frequency of inter-module and intra-module connections is plotted for each cluster. The dotted  
837 line indicates the overall frequency of intramodule connections (33.74%). The laminar patterns of clusters  
838 1 and 4 were relatively more frequent in intermodule connections, while clusters 3, 5, and 6 were  
839 associated more with intramodule connections. The relative frequencies within clusters are shown for  
840 each of the six modules as sources, for intramodule **(c)** and intermodule connections **(d)**. **(e)** 37 cortical  
841 areas are rank ordered by their hierarchical index scores and color coded by module assignment. **(f)** The  
842 relative differences in feedback to feedforward patterns between modules. Source module is indicated on  
843 the y-axis, and the relative differences in patterns between that module and every other target module is  
844 represented by the colored circles. Modules which had <10 connections were removed from analyses.  
845 Positive values indicate more feedback (FB) than feedforward (FF) connections from the source (y-axis)  
846 to target (plotted circles) module. Negative values indicate more FF than FB connection types. **(g)** The  
847 difference between the values plotted in (f) for each pair of modules as source and target, used to  
848 determine pairwise hierarchical positions. Positive values indicate the overall direction is feedback, given  
849 the reciprocal connection, from the source module on the y-axis to the target module (circles). Negative  
850 values indicate a feedforward connection from source to target modules. All intermodule connections from  
851 the prefrontal cortex were feedback. All from the somatomotor module were feedforward. Thus, these two  
852 modules formed the top and bottom of an intermodule hierarchy. **(h)** Network diagram showing  
853 interconnections of all 10 visual areas (visual module = blue, medial module = purple). Edge width  
854 indicates relative connection strength (from **Figure 2b**). The direction of the curved line shows outputs  
855 (clockwise) and inputs (counter-clockwise) from each node. Nodes are positioned along a circle perimeter  
856 based on hierarchical score, with VISp at the bottom and VISam at the top. All areas have strong  
857 feedback to VISp. **(i)** The intermodule network diagram shows each module as a node, with edge  
858 thicknesses based on the sum of connection weights from **Figure 2b**. Based on the pair-wise calls from  
859 data in **(g)**, we propose a hierarchical order of network modules that is consistent across levels. At the  
860 bottom is somatomotor, temporal, and visual, then medial, anterolateral, and, at the top, prefrontal.

861



## 862 Acknowledgements

863 We thank the Animal Care, Transgenic Colony Management and Lab Animal Services teams for mouse  
864 husbandry and tissue preparation. We thank all the members of the Neurosurgery and Behavior team for  
865 viral injections, including those not listed as authors: N. Berbesque, N. Bowles, S. Cross, M. Edwards, S.  
866 Lambert, W. Liu, K. Mace, N. Mastan, C. Nayan, B. Rogers, J. Swapp, C. White, and N. Wong. We also  
867 thank H. Gu for cloning of the synaptophysin-EGFP viral vector, E. Lee, F. Griffin, and T. Nguyen for  
868 intrinsic signal imaging, and J. Royall and P. Lesnar for schematic figure preparation. This work was  
869 supported by the Allen Institute for Brain Science and, in part, by National Institutes of Health grants  
870 R01AG047589 to J.A.H and U01MH105982 to H.Z. We thank the Allen Institute founder, Paul G. Allen,  
871 for his vision, encouragement, and support.

872

## 873 Author Contributions

874 Conceptualization: H.Z., J.A.H., S.M. Supervision: H.Z., J.A.H., S.M., A.B., L.N., N.G., P.A.G., J.L., S.A.S,  
875 J.W.P., A.J., C.K. Project administration: S.M., S.W.O., W.W. Investigation, validation, methodology and  
876 formal analyses: J.A.H., S.M., K.E.H., J.D.W, J.K., P.B., S.C., L.C., A.C., N.G., N.G., C.G., P.A.G.,  
877 A.M.H., A.H., R.H., L.K., J.L., J.L., M.T.M., M.N., L.N., B.O., S.A.S., Q.W., A.W, H.Z. Data curation:  
878 J.A.H., K.E.H., J.D.W., P.B., S.C., A.H., B.O., W.W. Visualization: J.A.H., K.E.H., J.D.W., L.N., D.F., S.M.,  
879 M.N. The original draft was written by J.A.H., with input from K.E.H., J.D.W, S.M., Q.W., P.A.G., C.K., and  
880 H.Z. All co-authors reviewed the manuscript.

## 881 Methods

### 882 *Mice*

883 Experiments involving mice were approved by the Institutional Animal Care and Use Committees of the  
884 Allen Institute for Brain Science in accordance with NIH guidelines. Sources of mouse lines are listed in  
885 Supplemental Table 1. Characterization of the expression patterns of Cre driver lines used in this study  
886 have previously been described<sup>23</sup>. Links to image series data are available through the Transgenic  
887 Characterization data portal (<http://connectivity.brain-map.org/transgenic>). Cre lines were derived on  
888 various backgrounds, but the majority were crossed to C57BL/6J mice and maintained as heterozygous  
889 lines upon arrival. Tracer injections were performed in male and female mice at an average age of P56 +  
890 10 days. Mice were group-housed in a 12-hour light/dark cycle. Food and water were provided ad libitum.

### 891 *Tracers and injection methods*

892 rAAV was used as an anterograde tracer. For most regions, stereotaxic coordinates were used to identify  
893 the appropriate location for a tracer injection<sup>61</sup>. For a subset of experiments in the left hemisphere, we first  
894 functionally mapped the visual cortex using intrinsic signal imaging (ISI) through the skull, described  
895 below. A pan-neuronal AAV expressing EGFP (rAAV2/1.hSynapsin.EGFP.WPRE.bGH, Penn Vector  
896 Core, AV-1-PV1696, Addgene ID 105539) was used for injections into wildtype C57BL/6J mice (stock no.  
897 00064, The Jackson Laboratory). To label genetically-defined populations of neurons, we used either a  
898 Cre-dependent AAV vector that robustly expresses EGFP within the cytoplasm of Cre-expressing infected  
899 neurons (AAV2/1.pCAG.FLEX.EGFP.WPRE.bGH, Penn Vector Core, AV-1-ALL854, Addgene ID 51502).  
900 or, a Cre-dependent AAV virus expressing a synaptophysin-EGFP fusion protein to more specifically label  
901 presynaptic terminals (AAV2/1.pCAG.FLEX.sypEGFP.WPRE.bGH, Penn Vector Core).

902 Functional mapping of visual field space by intrinsic signal optical imaging (ISI) was used in some cases  
903 to guide injection placement. Additional details of this procedure can be found online ([http://help.brain-  
904 map.org/display/mouseconnectivity/Documentation?preview=/2818171/10813533/Connectivity+Overview.  
905 pdf](http://help.brain-map.org/display/mouseconnectivity/Documentation?preview=/2818171/10813533/Connectivity+Overview.pdf)). Briefly, a custom 3D-printed headframe was attached to the skull, centered at 3.1 mm lateral and 1.3  
906 mm anterior to lambda on the left hemisphere. A transcranial window was made by securing a 7-mm  
907 glass coverslip onto the skull in the center of the headframe well. Mice were recovered for at least seven  
908 days before ISI mapping. ISI was then used to measure the hemodynamic response to visual stimulation  
909 across the entire field of view of a lightly anesthetized, head-fixed, mouse. The visual stimulus consisted

910 of sweeping a bar containing a flickering black-and-white checkerboard pattern across a grey  
911 background<sup>62</sup>. To generate a map, the bar was swept across the screen ten times in each of the four  
912 cardinal directions, moving at 9° per second. Processing of sign maps followed methods previously  
913 described<sup>63</sup>, with minor modifications. Phase maps were generated by calculating the phase angle of the  
914 pre-processed DFT at the stimulus frequency. The phase maps were used to translate the location of a  
915 visual stimulus displayed on the retina to a spatial location on the cortex. A sign map was produced from  
916 the phase maps by taking the sign of the angle between the altitude and azimuth map gradients.  
917 Averaged sign maps were produced from a minimum of three time series images, for a combined  
918 minimum average of 30 stimulus sweeps in each direction. Visual area segmentation and identification  
919 was obtained by converting the visual field map to a binary image using a manually-defined threshold and  
920 further processing the initial visual areas with split/merge routine<sup>63</sup>. Sign maps were curated and the  
921 experiment repeated if; (1) <6 visual areas were positively identified, (2) retinotopic metrics of V1 were out  
922 of bounds (azimuth coverage within 60-100 degrees and altitude coverage within 35-60 degrees) or, (3)  
923 auto-segmented maps needed to be annotated with more than 3 adjustments. Each animal had 3  
924 attempts to get a passing map.

925 All mice received one unilateral injection into a single target region. For injections using stereotaxic  
926 coordinates from bregma as a registration point, an incision was made to expose the skull and bregma  
927 was visualized using a stereomicroscope. A hole overlying the targeted area was made by first thinning  
928 the skull using a fine drill burr, then using a microprobe and fine forceps to remove the bone, revealing  
929 the brain surface. For ISI-guided injections, the glass coverslip of the transcranial window was removed  
930 by drilling around the edges and a small burr hole drilled, first through the Metabond and then through the  
931 skull using surface vasculature fiducials obtained from the ISI session as a guide. An overlay of the sign  
932 map over the vasculature fiducials was used to identify the target injection site. rAAV was delivered by  
933 iontophoresis with current settings of 3  $\mu$ A at 7 s 'on' and 7 s 'off' cycles for 5 min total, using glass  
934 pipettes (inner tip diameters of 10–20  $\mu$ m). Mice were perfused transcardially and brains collected 3  
935 weeks post-injection for Cre mice.

### 936 *Serial two-photon tomography*

937 Imaging by serial two-photon (STP) tomography (TissueCyte 1000, TissueVision Inc. Somerville, MA) has  
938 been described<sup>4,27</sup>, and here we used the exact same procedures as our earlier published studies<sup>4,25</sup>.

### 939 *Image data processing*

940 STP images were processed using the informatics data pipeline (IDP), which manages the processing  
941 and organization of the image and quantified data for analysis and display in the web application as  
942 previously described<sup>4,28</sup>. The two key algorithms are signal detection and image registration.

943 The signal detection algorithm was applied to each image to segment positive fluorescent signals from  
944 background. Image intensity was first rescaled by square root transform to remove second-order effects  
945 followed by histogram matching at the midpoint to a template profile. Median filtering and large kernel low  
946 pass filter was then applied to remove noise. Signal detection on the processed image was based on a  
947 combination of adaptive edge/line detection and morphological processing. Two variations of the  
948 algorithm were employed, depending on the virus used for that experiment; one was tuned for EGFP, and  
949 one for SypEGFP detection. High-threshold edge information was combined with spatial distance-  
950 conditioned low-threshold edge results to form candidate signal object sets. The candidate objects were  
951 then filtered based on their morphological attributes such as length and area using connected component  
952 labelling. For the SypEGFP data, filters were tuned to detect smaller objects (punctate terminal boutons  
953 vs long fibers). In addition, high intensity pixels near the detected objects were included into the signal  
954 pixel set. Detected objects near hyper-intense artifacts occurring in multiple channels were removed. We  
955 developed an additional filtering step using a supervised decision tree classifier to filter out surface  
956 segmentation artifacts (**Supplemental Figure 9**), based on morphological measurements, location  
957 context and the normalized intensities of all three channels.

958 The output is a full resolution mask that classifies each  $0.35 \mu\text{m} \times 0.35 \mu\text{m}$  pixel as either signal or  
959 background. An isotropic 3-D summary of each brain is constructed by dividing each image into  
960  $10 \mu\text{m} \times 10 \mu\text{m}$  grid voxels. Total signal is computed for each voxel by summing the number of signal-  
961 positive pixels in that voxel. Each image stack is registered in a multi-step process using both global  
962 affine and local deformable registration to the 3-D Allen mouse brain reference atlas as previously  
963 described<sup>28</sup>. Segmentation and registration results are combined to quantify signal for each voxel in the  
964 reference space and for each structure in the reference atlas ontology by combining voxels from the  
965 same structure.

#### 966 *Creation of the cortical top-down and flattened views of the CCF for data visualization.*

967 A standard z-projection of signal in a top-down view of the cortex mixes signal from multiple areas.  
968 Visualizations of fluorescence in **Figures 1-3** instead project signal along a curved cortical coordinate  
969 system that more closely matches the columnar structure of the cortex. This coordinate system was  
970 created by first solving Laplace's equation between pia and white matter surfaces, resulting in  
971 intermediate equi-potential surfaces. Streamlines were computed by finding orthogonal (steepest  
972 descent) paths through the equi-potential field. Cortical signal can then be projected along these  
973 streamlines for visualization.

974 A cortical flatmap was also constructed to enable visualization of anatomical and projection information  
975 while preserving spatial context for the entire cortex. The flatmap was created by computing the geodesic  
976 distance (the shortest path between two points on a curve surface) between every point on the cortical  
977 surface and two pairs of selected anchor points. Each pair of anchor points form one axis of the 2D  
978 embedding of the cortex into a flatmap. The 2D coordinate for each point on the cortical surface is  
979 obtained by finding the location such that the radial (circular) distance from the anchor points (in 2D)  
980 equals to the geodesic distance that was computed in 3D. This procedure produces smooth mapping of  
981 the cortical surface onto a 2D plane for visualization. This embedding does not preserve area and the  
982 frontal pole and medial-posterior region is highly distorted. As such, all numerical computation is done in  
983 3D space. Similar techniques are used for texture mapping on geometric models in the field of computer  
984 graphics<sup>64</sup>.

#### 985 *Data availability*

986 Data (high resolution images, segmentation, registration to CCF, automated quantification) are available  
987 through the Allen Mouse Brain Connectivity Atlas portal (<http://connectivity.brain-map.org/>). In addition to  
988 visualization and search tools available at this site, users can also download data using the Allen Brain  
989 Atlas API (<http://help.brain-map.org/display/mouseconnectivity/API>) and the Allen Brain Atlas Software  
990 Development Kit (SDK: <http://alleninstitute.github.io/AllenSDK/connectivity.html>). Through the SDK,  
991 structure and voxel-level projection data is available for download. Examples of code for common data  
992 requests are provided as part of the Mouse Connectivity Jupyter notebook to help users get started with  
993 their own data analyses.

#### 994 *Network modularity analysis*

995 The matrix of connection weights between cortical areas (**Figure 2b**) was obtained from a novel model<sup>31</sup>.  
996 Briefly, this model allows us to predict the structural connectivity strengths between any given brain  
997 region in the mouse at the scale of voxels. This model combines the information from the 'wild type' viral  
998 tracing experiments performed as a part of the Allen Mouse Brain Connectivity Atlas. It uses the spatial  
999 information given by distances to injection sites to infer a connectivity strength from a given voxel to every  
1000 other voxel in the Allen CCF.

1001 We analyzed the network structure of this graph using the Louvain Community Detection algorithm from  
1002 the Brain Connectivity Toolbox (<https://sites.google.com/site/bctnet/>)<sup>32,65</sup>. The Louvain algorithm uses a  
1003 greedy algorithm to define groups of nodes (modules) that are more connected to each other than they  
1004 are to other nodes outside their module. We determined the modularity at various levels of granularity by  
1005 varying the resolution parameter,  $\gamma$ , from 0-2.5 in steps of 0.1. For each value of  $\gamma$ , the modularity was

1006 computed 1000x and each pair of regions received an affinity score between 0 and 1. The affinity score is  
1007 the probability of two regions being assigned to the same module weighted by the modularity score (Q)  
1008 for that iteration, thereby assigning higher weights to partitions with a higher modularity score. Each  
1009 region was assigned to the module with which it had the highest affinity, with the caveat that all structures  
1010 within a module had an affinity score  $\geq 0.5$  with all other members of the module. For each value of  $\gamma$ , we  
1011 also generated a shuffled matrix containing the same weights but with the source and target regions  
1012 randomized. The modularity for the cortical and hippocampal matrix (Q) and the shuffled matrix (Q<sub>shuffled</sub>)  
1013 were evaluated at each value of  $\gamma$ .

#### 1014 *Clustering Analyses and Statistics*

1015 Unsupervised hierarchical clustering was conducted with the online software, Morpheus,  
1016 (<https://software.broadinstitute.org/morpheus/>) for algorithms and for visualization of the dendrogram and  
1017 heat maps. Log-transforms were calculated on all values after adding a small value (0.5 minimum of the  
1018 true positive array elements) to avoid Log (0). Proximity between clusters was computed using average  
1019 linkages with spearman rank correlations as the distance metric. The clustering algorithm works  
1020 agglomeratively: initially assigning each sample to its own cluster and iteratively merging the most  
1021 proximal pair of clusters until finally all the clusters have been merged. To compare distances between  
1022 granular and agranular samples (those that lack a L4), the computation of the distance metric was  
1023 restricted to the set of shared layer projection fractions. In other words, we used the set of projection  
1024 fractions in all layers when evaluating granular-granular distances, whereas when evaluating agranular-  
1025 agranular or agranular-granular cortex, we used the set of all layers except L4. The software program  
1026 GraphPad Prism was used for statistical tests and generation of all graphs, and the software program  
1027 Gephi was used for visualization and layout of network diagrams.

#### 1028 *Unsupervised discovery of hierarchy position*

1029 Following the classification of the laminar patterns in clusters, we use an unsupervised method to  
1030 simultaneously assign a direction to a cluster type and to construct a hierarchy.

1031 First consider a mapping function

$$1032 \quad M: [1, c] \cap N \rightarrow \{-1, 1\}$$

1033 which maps a type of connection cluster to either feedforward (M=1) or feedback (M=-1) type. We search  
1034 over the space of possible maps to see which map produces the most self-consistent hierarchy. Since  
1035 some transgenic line have different numbers of connections in different clusters, some maps will lead to  
1036 particular transgenic lines having very biased feedforward or feedback calls. Thus, we add a confidence  
1037 measure, which decreases the importance of the information provided by a transgenic line to the global  
1038 hierarchy if the calls from that transgenic line are biased.

$$1039 \quad \text{conf}(T) = 1 - \left| \langle M(C_{T_{i,j}}) \rangle_{i,j} \right| \quad (1)$$

1040 with a global confidence as an average over all the inter-areal connections above the threshold ( $10^{-1.5}$ )

$$1041 \quad \text{conf}_g = \langle \text{conf}(T) \rangle_{i,j} \quad (2)$$

1042 We define the hierarchical position of a source area based on the difference between the feedback and  
1043 feedforward connections originating from this area, normalized by the number of connections, which is  
1044 normalized by the confidence we have from different Cre lines providing information about the  
1045 directionality of the connection. The hierarchical position as a target is the difference between the  
1046 feedforward and feedback connections terminating in this area, normalized by the number of connections  
1047 and confidence. The hierarchical position of an area is defined as the sum of these measures:

$$1048 \quad H_i = \frac{1}{\text{conf}_g} (\langle M(C_{T_{i,j}}) \cdot \text{conf}(T) \rangle_j - \langle M(C_{T_{j,i}}) \cdot \text{conf}(T) \rangle_j) \quad (3)$$



1049 To test how self-consistent a hierarchy is we define the global hierarchy score:

1050 
$$H = \frac{1}{2 \cdot \text{conf}} \langle M \left( C_{T_{i,j}} \right) \cdot \text{conf}(T) \cdot (H_i - H_j) \rangle_{i,j} \quad (4)$$

1051 We performed an exhaustive search over all the maps M for the entire set of cortico-cortical connections,  
1052 and the most self-consistent hierarchy is obtained when connections of type 1,3 and 5 are of one type  
1053 and 2,4 and 6 are of the opposite type. Based on the position of the sensory areas, we conclude that type  
1054 1,3 and 5 are feedforward and 2,4 and 6 are feedback. It should be noted that a similar search inside of  
1055 the visual module results in mapping connections 3 and 5 to feedforward and 1,2,4 and 6 to feedback.

## 1056 References

- 1057 1. Sporns, O., Tononi, G. & Kötter, R. The Human Connectome: A Structural Description of the  
1058 Human Brain. *PLoS Comput. Biol.* **1**, e42 (2005).
- 1059 2. Bohland, J. W. *et al.* A Proposal for a Coordinated Effort for the Determination of Brainwide  
1060 Neuroanatomical Connectivity in Model Organisms at a Mesoscopic Scale. *PLoS Comput. Biol.* **5**,  
1061 e1000334 (2009).
- 1062 3. Zingg, B. *et al.* Neural Networks of the Mouse Neocortex. *Cell* **156**, 1096–1111 (2014).
- 1063 4. Oh, S. W. *et al.* A mesoscale connectome of the mouse brain. *Nature* **508**, 207–214 (2014).
- 1064 5. Markov, N. T. *et al.* A weighted and directed interareal connectivity matrix for macaque cerebral  
1065 cortex. *Cereb. Cortex* **24**, 17–36 (2014).
- 1066 6. Bota, M., Sporns, O. & Swanson, L. W. Architecture of the cerebral cortical association  
1067 connectome underlying cognition. *Proc. Natl. Acad. Sci.* **112**, E2093–E2101 (2015).
- 1068 7. Scannell, J. W., Blakemore, C. & Young, M. P. Analysis of connectivity in the cat cerebral cortex.  
1069 *J. Neurosci.* **15**, 1463–83 (1995).
- 1070 8. Swanson, L. W., Hahn, J. D. & Sporns, O. Organizing principles for the cerebral cortex network of  
1071 commissural and association connections. *Proc. Natl. Acad. Sci.* **114**, E9692–E9701 (2017).
- 1072 9. Bullmore, E. & Sporns, O. Complex brain networks: graph theoretical analysis of structural and  
1073 functional systems. *Nat. Rev. Neurosci.* **10**, 186–198 (2009).
- 1074 10. Sporns, O. *Connectome Networks: From Cells to Systems. Micro-, Meso- and Macro-*  
1075 *Connectomics of the Brain* (Springer, 2016). doi:10.1007/978-3-319-27777-6\_8
- 1076 11. Wang, Q., Sporns, O. & Burkhalter, A. Network analysis of corticocortical connections reveals  
1077 ventral and dorsal processing streams in mouse visual cortex. *J. Neurosci.* **32**, 4386–99 (2012).
- 1078 12. Felleman, D. J. & Van Essen, D. C. Distributed Hierarchical Processing in the Primate Cerebral  
1079 Cortex. *Cereb. Cortex* **1**, 1–47 (1991).
- 1080 13. Rockland, K. S. & Pandya, D. N. Laminar origins and terminations of cortical connections of the  
1081 occipital lobe in the rhesus monkey. *Brain Res.* **179**, 3–20 (1979).
- 1082 14. Riesenhuber, M. & Poggio, T. Hierarchical models of object recognition in cortex. *Nat. Neurosci.* **2**,  
1083 1019–1025 (1999).
- 1084 15. Tasic, B. *et al.* Adult mouse cortical cell taxonomy revealed by single cell transcriptomics. *Nat.*  
1085 *Neurosci.* **19**, 335–346 (2016).
- 1086 16. Tasic, B. *et al.* Shared and distinct transcriptomic cell types across neocortical areas. *bioRxiv*  
1087 229542 (2017). doi:10.1101/229542
- 1088 17. Zeng, H. & Sanes, J. R. Neuronal cell-type classification: challenges, opportunities and the path  
1089 forward. *Nat. Rev. Neurosci.* **18**, 530–546 (2017).

- 1090 18. Sorensen, S. A. *et al.* Correlated gene expression and target specificity demonstrate excitatory  
1091 projection neuron diversity. *Cereb. Cortex* **25**, 433–449 (2015).
- 1092 19. Shepherd, G. M. G. Corticostriatal connectivity and its role in disease. *Nat. Rev. Neurosci.* **14**,  
1093 278–291 (2013).
- 1094 20. Harris, K. D. & Shepherd, G. M. G. The neocortical circuit: themes and variations. *Nat. Neurosci.*  
1095 **18**, 170–181 (2015).
- 1096 21. Gong, S. *et al.* Targeting Cre Recombinase to Specific Neuron Populations with Bacterial Artificial  
1097 Chromosome Constructs. *J. Neurosci.* **27**, 9817–9823 (2007).
- 1098 22. Gerfen, C. R., Paletzki, R. & Heintz, N. GENSAT BAC Cre-Recombinase Driver Lines to Study the  
1099 Functional Organization of Cerebral Cortical and Basal Ganglia Circuits. *Neuron* **80**, 1368–1383  
1100 (2013).
- 1101 23. Harris, J. A. *et al.* Anatomical characterization of Cre driver mice for neural circuit mapping and  
1102 manipulation. *Front. Neural Circuits* **8**, 1–16 (2014).
- 1103 24. Daigle, T. L. *et al.* A suite of transgenic driver and reporter mouse lines with enhanced brain cell  
1104 type targeting and functionality. *bioRxiv* 224881 (2017). doi:10.1101/224881
- 1105 25. Martersteck, E. M. *et al.* Diverse Central Projection Patterns of Retinal Ganglion Cells. *Cell Rep.*  
1106 **18**, 2058–2072 (2017).
- 1107 26. Coogan, T. A., Burkhalter, A. & Martin, K. Hierarchical organization of areas in rat visual cortex. *J.*  
1108 *Neurosci.* **13**, 3749–72 (1993).
- 1109 27. Ragan, T. *et al.* Serial two-photon tomography for automated ex vivo mouse brain imaging. *Nat.*  
1110 *Methods* **9**, 255–8 (2012).
- 1111 28. Kuan, L. *et al.* Neuroinformatics of the allen mouse brain connectivity atlas. *Methods* **73**, 4–17  
1112 (2015).
- 1113 29. Kim, E. J., Juavinett, A. L., Kyubwa, E. M., Jacobs, M. W. & Callaway, E. M. Three Types of  
1114 Cortical Layer 5 Neurons That Differ in Brain-wide Connectivity and Function. *Neuron* **88**, 1253–  
1115 1267 (2015).
- 1116 30. Olsen, S. R., Bortone, D. S., Adesnik, H. & Scanziani, M. Gain control by layer six in cortical  
1117 circuits of vision. *Nature* **483**, 47–52 (2012).
- 1118 31. Knox, J. E. *et al.* High resolution data-driven model of the mouse connectome. *bioRxiv* 293019  
1119 (2018). doi:10.1101/293019
- 1120 32. Rubinov, M. & Sporns, O. Complex network measures of brain connectivity: Uses and  
1121 interpretations. *Neuroimage* **52**, 1059–1069 (2010).
- 1122 33. Sporns, O. & Betzel, R. F. Modular Brain Networks. *Annu. Rev. Psychol.* **67**, 613–640 (2016).
- 1123 34. Ria Ercsey-Ravasz, M. *et al.* A Predictive Network Model of Cerebral Cortical Connectivity Based  
1124 on a Distance Rule. *Neuron* **80**, 184–197 (2013).
- 1125 35. Jacomy, M., Venturini, T., Heymann, S. & Bastian, M. ForceAtlas2, a Continuous Graph Layout  
1126 Algorithm for Handy Network Visualization Designed for the Gephi Software. *PLoS One* **9**, e98679  
1127 (2014).
- 1128 36. Gămănuț, R. *et al.* The Mouse Cortical Connectome, Characterized by an Ultra-Dense Cortical  
1129 Graph, Maintains Specificity by Distinct Connectivity Profiles. *Neuron* **97**, 698–715.e10 (2018).
- 1130 37. Markov, N. T. *et al.* Weight Consistency Specifies Regularities of Macaque Cortical Networks.  
1131 *Cereb. Cortex* **21**, 1254–1272 (2011).

- 1132 38. Maunsell, J. H. & van Essen, D. C. The connections of the middle temporal visual area (MT) and  
1133 their relationship to a cortical hierarchy in the macaque monkey. *J. Neurosci.* **3**, 2563–86 (1983).
- 1134 39. Markov, N. T. *et al.* Anatomy of hierarchy: Feedforward and feedback pathways in macaque visual  
1135 cortex. *J. Comp. Neurol.* **522**, 225–259 (2014).
- 1136 40. D'Souza, R. D., Meier, A. M., Bista, P., Wang, Q. & Burkhalter, A. Recruitment of inhibition and  
1137 excitation across mouse visual cortex depends on the hierarchy of interconnecting areas. *Elife* **5**,  
1138 e19332 (2016).
- 1139 41. D'Souza, R. D. & Burkhalter, A. A Laminar Organization for Selective Cortico-Cortical  
1140 Communication. *Front. Neuroanat.* **11**, 1–13 (2017).
- 1141 42. Marshel, J. H., Garrett, M. E., Nauhaus, I. & Callaway, E. M. Functional Specialization of Seven  
1142 Mouse Visual Cortical Areas. *Neuron* **72**, 1040–1054 (2011).
- 1143 43. Huh, C. Y. L., Peach, J. P., Bennett, C., Vega, R. M. & Hestrin, S. Feature-Specific Organization of  
1144 Feedback Pathways in Mouse Visual Cortex. *Curr. Biol.* **28**, 114–120.e5 (2018).
- 1145 44. Zhang, S. *et al.* Selective attention. Long-range and local circuits for top-down modulation of visual  
1146 cortex processing. *Science* **345**, 660–5 (2014).
- 1147 45. Leinweber, M., Ward, D. R., Sobczak, J. M., Attinger, A. & Keller, G. B. A Sensorimotor Circuit in  
1148 Mouse Cortex for Visual Flow Predictions. *Neuron* **95**, 1420–1432.e5 (2017).
- 1149 46. Wang, Q., Sporns, O. & Burkhalter, A. Network Analysis of Corticocortical Connections Reveals  
1150 Ventral and Dorsal Processing Streams in Mouse Visual Cortex. *J. Neurosci.* **32**, 4386–4399  
1151 (2012).
- 1152 47. Carlén, M. What constitutes the prefrontal cortex? *Science* **358**, 478–482 (2017).
- 1153 48. Avery, J. A. *et al.* Convergent gustatory and viscerosensory processing in the human dorsal mid-  
1154 insula. *Hum. Brain Mapp.* **38**, 2150–2164 (2017).
- 1155 49. Hanamori, T., Kunitake, T., Kato, K. & Kannan, H. Responses of Neurons in the Insular Cortex to  
1156 Gustatory, Visceral, and Nociceptive Stimuli in Rats. *J. Neurophysiol.* **79**, 2535–2545 (1998).
- 1157 50. Veinante, P. & Deschênes, M. Single-cell study of motor cortex projections to the barrel field in  
1158 rats. *J. Comp. Neurol.* **464**, 98–103 (2003).
- 1159 51. Douglas, R. J. & Martin, K. A. C. NEURONAL CIRCUITS OF THE NEOCORTEX. *Annu. Rev.*  
1160 *Neurosci.* **27**, 419–451 (2004).
- 1161 52. Fame, R. M., MacDonald, J. L. & Macklis, J. D. Development, specification, and diversity of  
1162 callosal projection neurons. *Trends Neurosci.* **34**, 41–50 (2011).
- 1163 53. Yamins, D. L. K. & DiCarlo, J. J. Using goal-driven deep learning models to understand sensory  
1164 cortex. *Nat. Neurosci.* **19**, 356–365 (2016).
- 1165 54. Rao, R. P. N. & Ballard, D. H. Predictive coding in the visual cortex: a functional interpretation of  
1166 some extra-classical receptive-field effects. *Nat. Neurosci.* **2**, 79–87 (1999).
- 1167 55. Cain, N., Iyer, R., Koch, C. & Mihalas, S. The Computational Properties of a Simplified Cortical  
1168 Column Model. *PLOS Comput. Biol.* **12**, e1005045 (2016).
- 1169 56. Coogan, T. A. & Burkhalter, A. Conserved patterns of cortico-cortical connections define areal  
1170 hierarchy in rat visual cortex. *Exp. brain Res.* **80**, 49–53 (1990).
- 1171 57. Shipp, S. The importance of being agranular: a comparative account of visual and motor cortex.  
1172 *Philos. Trans. R. Soc. B Biol. Sci.* **360**, 797–814 (2005).
- 1173 58. Kim, Y. *et al.* Brain-wide Maps Reveal Stereotyped Cell-Type-Based Cortical Architecture and

- 1174 Subcortical Sexual Dimorphism. *Cell* **171**, 456–469.e22 (2017).
- 1175 59. Han, Y. *et al.* The logic of single-cell projections from visual cortex. *Nature* (2018).  
1176 doi:10.1038/nature26159
- 1177 60. Economo, M. N. *et al.* A platform for brain-wide imaging and reconstruction of individual neurons.  
1178 *Elife* **5**, (2016).
- 1179 61. Franklin, K. B. J. & Paxinos, G. *Paxinos and Franklin's The mouse brain in stereotaxic*  
1180 *coordinates*. (2012).
- 1181 62. Kalatsky, V. A. & Stryker, M. P. New paradigm for optical imaging: temporally encoded maps of  
1182 intrinsic signal. *Neuron* **38**, 529–45 (2003).
- 1183 63. Garrett, M. E., Nauhaus, I., Marshel, J. H. & Callaway, E. M. Topography and Areal Organization  
1184 of Mouse Visual Cortex. *J. Neurosci.* **34**, 12587–12600 (2014).
- 1185 64. Oliveira, G. N., Torchelsen, R. P., Comba, J. L. D., Walter, M. & Bastos, R. Geotextures: A Multi-  
1186 source Geodesic Distance Field Approach for Procedural Texturing of Complex Meshes. in *2010*  
1187 *23rd SIBGRAPI Conference on Graphics, Patterns and Images* 126–133 (IEEE, 2010).  
1188 doi:10.1109/SIBGRAPI.2010.25
- 1189 65. Blondel, V. D., Guillaume, J.-L., Lambiotte, R. & Lefebvre, E. Fast unfolding of communities in  
1190 large networks. *J. Stat. Mech. Theory Exp.* **2008**, P10008 (2008).
- 1191
